# Supplementary material
Source: Research Square preprint supplement (doi:10.21203/rs.3.rs-8944437/v1)
Supplement: Supplementary file 2 [file 77a908684dbe80781022a09c.pdf]

Project: Bugesera - Nyanza - Gisagara Transmission line  
 Logged by: IRADUKUNDA Jeremie  
 District: Bugesera  
 Borehole: BH1  
 Drilling method: Drilling rig with a double tube coring barrel

Boring Depth: 12.45 meters  
 X coordinate: 848800.636  
 Y coordinate: 9750936.68  
 Water Level: No GW until 12 meters

| DEPTH BELOW | LITHOLOGY                                                                                                                    |                   |        | SAMPLING DATA |             |                            |
|-------------|------------------------------------------------------------------------------------------------------------------------------|-------------------|--------|---------------|-------------|----------------------------|
|             | GEOLOGIC DESCRIPTION OF SOIL AND ROCK STRATA                                                                                 | LITHOLOGIC SYMBOL | NUMBER | SPT DATA      | SPT N Value | SPT GRAPH (Blows Per Foot) |
| 00          | Dark brown to black, soft, organic-rich vegetal soil with traces of peat; loose structure, high moisture content             |                   |        |               |             |                            |
| 1           | Gray, soft to firm clay, plastic, moist to wet, with low permeability                                                        |                   | SPT1   | 7-7-8         | 15          |                            |
| 2           |                                                                                                                              |                   | SPT2   | 11-7-15       | 22          |                            |
| 3           | Grayish, stiff gravelly sandy clay; dry to moist, low to medium plasticity, with scattered fine to medium subangular gravels |                   | SPT3   | '10-16-20     | 14          |                            |
| 4           |                                                                                                                              |                   | SPT4   | '14-22-25     | 20          |                            |
| 5           |                                                                                                                              |                   | SPT5   | 20-30-20      | 36          |                            |
| 6           |                                                                                                                              |                   | SPT6   | 25-35-15      | 50          |                            |
| 7           |                                                                                                                              |                   | SPT7   | 30-42-8       | 50          |                            |
| 8           |                                                                                                                              |                   | SPT8   | '8-38-12      | 50          |                            |
| 9           | Gray, medium dense clayey sand, fine to medium grained, slightly micaceous, moist, with low to medium plasticity             |                   | SPT9   | '19-29-21     | 50          |                            |
| 10          |                                                                                                                              |                   | SPT10  | '18-25-25     | 50          |                            |
| 11          |                                                                                                                              |                   | SPT11  | '20-28-22     | 50          |                            |
| 12          |                                                                                                                              |                   | SPT12  | '17-24-26     | 50          |                            |
| 13          |                                                                                                                              |                   |        |               |             |                            |

Notes :

Project: Bugesera - Nyanza - Gisagara Transmission line  
 Logged by: IRADUKUNDA Jeremie  
 District: Bugesera  
 Borehole: BH2  
 Drilling method: Drilling rig with a double tube coring barrel

Boring Depth: 12.45 meters  
 X coordinate: 848328.615  
 Y coordinate: 9750793.867  
 Water Level: No GW until 12 meters

| DEPTH BELOW | LITHOLOGY                                                                                          |                                                                                     |        | SAMPLING DATA |             |                                                                                      |
|-------------|----------------------------------------------------------------------------------------------------|-------------------------------------------------------------------------------------|--------|---------------|-------------|--------------------------------------------------------------------------------------|
|             | GEOLOGIC DESCRIPTION OF SOIL AND ROCK STRATA                                                       | LITHOLOGIC SYMBOL                                                                   | NUMBER | SPT DATA      | SPT N Value | SPT GRAPH (Blows Per Foot)                                                           |
| 00          | Blackish clay, soft consistency, high plasticity, with occasional organic traces                   | 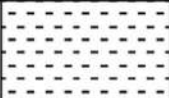   |        |               |             |                                                                                      |
| 1           | Gray, firm sandy clay with gravel; dry to moist, low to medium plasticity                          |   | SPT1   | 3-5-6         | 11          |  |
| 2           |                                                                                                    |                                                                                     | SPT2   | 6-8-14        | 22          |                                                                                      |
| 3           |                                                                                                    |                                                                                     | SPT3   | 9-12-16       | 28          |                                                                                      |
| 4           |                                                                                                    |                                                                                     | SPT4   | 14-16-20      | 36          |                                                                                      |
| 5           | Gray silty sand, fine to medium, slightly micaceous; loose to medium dense, dry to moist           |  | SPT5   | 18-20-23      | 43          |                                                                                      |
| 6           |                                                                                                    |                                                                                     | SPT6   | 17-22-25      | 47          |                                                                                      |
| 7           | Yellowish-gray silty sand, fine to medium, slightly micaceous; loose to medium dense, dry to moist |  | SPT7   | 18-24-26      | 50          |                                                                                      |
| 8           |                                                                                                    |                                                                                     | SPT8   | 16-25-25      | 50          |                                                                                      |
| 9           |                                                                                                    |                                                                                     | SPT9   | 20-28-22      | 50          |                                                                                      |
| 10          |                                                                                                    |                                                                                     | SPT10  | 18-25-25      | 50          |                                                                                      |
| 11          |                                                                                                    |                                                                                     | SPT11  | 14-21-26      | 47          |                                                                                      |
| 12          |                                                                                                    |                                                                                     | SPT12  | 17-23-26      | 49          |                                                                                      |
| 13          |                                                                                                    |                                                                                     |        |               |             |                                                                                      |

Notes :

Project: Bugesera - Nyanza - Gisagara Transmission line  
 Logged by: IRADUKUNDA Jeremie  
 District: Bugesera  
 Borehole: BH3  
 Drilling method: Drilling rig with a double tube coring barrel

Boring Depth: 12.45 meters  
 X coordinate: 829943.454  
 Y coordinate: 9746936.722  
 Water Level: From 0 meter

| DEPTH BELOW | LITHOLOGY                                                                                |                   |        | SAMPLING DATA |             |                            |
|-------------|------------------------------------------------------------------------------------------|-------------------|--------|---------------|-------------|----------------------------|
|             | GEOLOGIC DESCRIPTION OF SOIL AND ROCK STRATA                                             | LITHOLOGIC SYMBOL | NUMBER | SPT DATA      | SPT N Value | SPT GRAPH (Blows Per Foot) |
| 00          | Grayish to reddish silty sandy gravel, fine to medium, slightly moist, subangular grains |                   |        |               |             |                            |
| 1           | Grayish clayey gravel with sandstone fragments; slightly moist                           |                   | SPT1   | 3-4-5         | 9           |                            |
| 2           |                                                                                          |                   | SPT2   | 4-6-7         | 13          |                            |
| 3           | Blackish peat, highly organic and very soft                                              |                   | SPT3   | 1-2-2         | 4           |                            |
| 4           | Grayish clay, soft to firm, moist                                                        |                   | SPT4   | 2-2-2         | 4           |                            |
| 5           |                                                                                          |                   | SPT5   | 2-3-2         | 5           |                            |
| 6           |                                                                                          |                   | SPT6   | 3-2-2         | 4           |                            |
| 7           |                                                                                          |                   | SPT7   | 2-3-2         | 5           |                            |
| 8           | Blackish peat, highly organic and very soft                                              |                   | SPT8   | 2-2-2         | 4           |                            |
| 9           |                                                                                          |                   | SPT9   | 2-3-4         | 7           |                            |
| 10          |                                                                                          |                   | SPT10  | 3-4-5         | 9           |                            |
| 11          | Reddish silty sand with mica flakes; loose, slightly moist                               |                   | SPT11  | 4-8-10        | 18          |                            |
| 12          |                                                                                          |                   | SPT12  | 5-9-11        | 20          |                            |
| 13          |                                                                                          |                   |        |               |             |                            |

Notes :

Project: Bugesera - Nyanza - Gisagara Transmission line  
 Logged by: IRADUKUNDA Jeremie  
 District: Nyanza  
 Borehole: BH4  
 Drilling method: Drilling rig with a double tube coring barrel

Boring Depth: 12.45 meters  
 X coordinate: 828691.767  
 Y coordinate: 9746890.035  
 Water Level: No GW until 12 meters

| DEPTH BELOW | LITHOLOGY                                        |                   |        | SAMPLING DATA |             |                            |
|-------------|--------------------------------------------------|-------------------|--------|---------------|-------------|----------------------------|
|             | GEOLOGIC DESCRIPTION OF SOIL AND ROCK STRATA     | LITHOLOGIC SYMBOL | NUMBER | SPT DATA      | SPT N Value | SPT GRAPH (Blows Per Foot) |
| 00          | Blackish clay, soft, moist                       |                   |        |               |             |                            |
| 1           | Grayish shale, laminated, slightly weathered     |                   | SPT1   | 2-3-3         | 6           |                            |
| 2           |                                                  |                   | SPT2   | 4-5-7         | 12          |                            |
| 3           |                                                  |                   | SPT3   | 8-14-17       | 31          |                            |
| 4           |                                                  |                   | SPT4   | 16-24-26      | 50          |                            |
| 5           |                                                  |                   | SPT5   | 17-27-23      | 50          |                            |
| 6           |                                                  |                   | SPT6   | 14-28-22      | 50          |                            |
| 7           | Yellowish shale, moderately weathered, laminated |                   | SPT7   | 11-17-23      | 40          |                            |
| 8           |                                                  |                   | SPT8   | 18-25-25      | 50          |                            |
| 9           |                                                  |                   | SPT9   | 16-23-27      | 50          |                            |
| 10          |                                                  |                   | SPT10  | 22-30-20      | 50          |                            |
| 11          |                                                  |                   | SPT11  | 21-28-22      | 50          |                            |
| 12          |                                                  |                   | SPT12  | 20-32-18      | 50          |                            |
| 13          |                                                  |                   |        |               |             |                            |

Notes :

Project: Bugesera - Nyanza - Gisagara Transmission line  
 Logged by: IRADUKUNDA Jeremie  
 District: Bugesera  
 Borehole: BH5  
 Drilling method: Drilling rig with a double tube coring barrel

Boring Depth: 12.45 meters  
 X coordinate: 828163.534  
 Y coordinate: 9746631.583  
 Water Level: No GW until 12 meters

| DEPTH BELOW | LITHOLOGY                                                                                          |                             |        | SAMPLING DATA |             |                            |
|-------------|----------------------------------------------------------------------------------------------------|-----------------------------|--------|---------------|-------------|----------------------------|
|             | GEOLOGIC DESCRIPTION OF SOIL AND ROCK STRATA                                                       | LITHOLOGIC SYMBOL           | NUMBER | SPT DATA      | SPT N Value | SPT GRAPH (Blows Per Foot) |
| 00          | Brownish, soft silt with rootlets; dry to moist, medium plasticity, fine-grained, slightly organic | [Symbol: Dotted pattern]    | SPT1   | 6-7-9         | 16          |                            |
| 1           |                                                                                                    |                             |        |               |             |                            |
| 2           | Brownish, soft to firm silt; dry to moist, medium plasticity, fine-grained                         | [Symbol: Dotted pattern]    | SPT2   | 10-8-12       | 20          |                            |
| 3           |                                                                                                    |                             |        |               |             |                            |
| 4           |                                                                                                    |                             |        |               |             |                            |
| 4           | Brownish-yellowish gravelly sandy silt; firm, dry to moist, low plasticity                         | [Symbol: Horizontal dashes] | SPT4   | 17-22-27      | 49          |                            |
| 5           |                                                                                                    |                             |        |               |             |                            |
| 6           | Reddish sandy silt; firm, dry to moist, low plasticity                                             | [Symbol: Horizontal dashes] | SPT6   | 20-30-20      | 50          |                            |
| 7           |                                                                                                    |                             |        |               |             |                            |
| 8           | Brownish-yellowish silt; soft to firm, dry to moist, medium plasticity                             | [Symbol: Dotted pattern]    | SPT8   | 25-35-15      | 50          |                            |
| 9           |                                                                                                    |                             |        |               |             |                            |
| 10          |                                                                                                    |                             |        |               |             |                            |
| 11          | Yellowish silt; soft to firm, dry to moist, medium plasticity                                      | [Symbol: Dotted pattern]    | SPT11  | 23-42-8       | 50          |                            |
| 12          |                                                                                                    |                             |        |               |             |                            |
| 13          |                                                                                                    |                             |        |               |             |                            |

Notes :

Project: Bugesera - Nyanza - Gisagara Transmission line  
 Logged by: IRADUKUNDA Jeremie  
 District: Bugesera  
 Borehole: BH6  
 Drilling method: Drilling rig with a double tube coring barrel

Boring Depth: 12.45 meters  
 X coordinate: 824300.08  
 Y coordinate: 9747614.15  
 Water Level: No GW until 12 meters

| DEPTH BELOW | LITHOLOGY                                                                                                              |                                                                                     |        | SAMPLING DATA |             |                                                                                      |
|-------------|------------------------------------------------------------------------------------------------------------------------|-------------------------------------------------------------------------------------|--------|---------------|-------------|--------------------------------------------------------------------------------------|
|             | GEOLOGIC DESCRIPTION OF SOIL AND ROCK STRATA                                                                           | LITHOLOGIC SYMBOL                                                                   | NUMBER | SPT DATA      | SPT N Value | SPT GRAPH (Blows Per Foot)                                                           |
| 00          | Dark brownish, soft to firm silt; dry, medium plasticity, fine-grained, uniform texture                                | 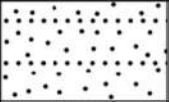   |        |               |             |  |
| 1           |                                                                                                                        |                                                                                     | SPT1   | 3-4-4         | 8           |                                                                                      |
| 2           |                                                                                                                        |                                                                                     | SPT2   | 4-5-7         | 12          |                                                                                      |
| 3           |                                                                                                                        |                                                                                     | SPT3   | 7-8-12        | 20          |                                                                                      |
| 4           |                                                                                                                        |                                                                                     | SPT4   | 10-14-16      | 30          |                                                                                      |
| 5           | SPT5                                                                                                                   | 14-20-23                                                                            | 43     |               |             |                                                                                      |
| 6           | Brownish-grayish clayey silt; firm, moist, medium plasticity                                                           |  | SPT6   | 11-17-20      | 37          |                                                                                      |
| 7           |                                                                                                                        |                                                                                     | SPT7   | 12-20-25      | 45          |                                                                                      |
| 8           | Yellowish to grayish, firm sandy clay; moist, low to medium plasticity, fine to medium sand content, slightly cohesive |  | SPT8   | 13-23-25      | 48          |                                                                                      |
| 9           |                                                                                                                        |                                                                                     | SPT9   | 17-25-25      | 50          |                                                                                      |
| 10          |                                                                                                                        |                                                                                     | SPT10  | 14-24-26      | 50          |                                                                                      |
| 11          |                                                                                                                        |                                                                                     | SPT11  | 13-20-24      | 44          |                                                                                      |
| 12          |                                                                                                                        |                                                                                     | SPT12  | 17-26-24      | 50          |                                                                                      |
| 13          |                                                                                                                        |                                                                                     |        |               |             |                                                                                      |

Notes :

Project: Bugesera - Nyanza - Gisagara Transmission line  
 Logged by: IRADUKUNDA Jeremie  
 District: Gisagara  
 Borehole: BH7  
 Drilling method: Drilling rig with a double tube coring barrel

Boring Depth: 12.45 meters  
 X coordinate: 829036  
 Y coordinate: 9725433  
 Water Level: No GW until 12 meters

| DEPTH BELOW | LITHOLOGY                                                              |                   |        | SAMPLING DATA |             |                            |
|-------------|------------------------------------------------------------------------|-------------------|--------|---------------|-------------|----------------------------|
|             | GEOLOGIC DESCRIPTION OF SOIL AND ROCK STRATA                           | LITHOLOGIC SYMBOL | NUMBER | SPT DATA      | SPT N Value | SPT GRAPH (Blows Per Foot) |
| 00          | Brownish sandy silt, loose, slightly moist                             |                   |        |               |             |                            |
| 1           | Reddish silty sand with mica flakes; loose, slightly moist             |                   | SPT1   | 4-4-7         | 11          |                            |
| 2           |                                                                        |                   | SPT2   | 7-9-13        | 22          |                            |
| 3           | "Orange to whitish silty sand with mica flakes; loose, slightly moist  |                   | SPT3   | 14-20-27      | 47          |                            |
| 4           | Brownish clay, firm, slightly moist                                    |                   | SPT4   | 19-30-20      | 50          |                            |
| 5           |                                                                        |                   | SPT5   | 25-35-15      | 50          |                            |
| 6           | Orange to whitish silty sand with mica flakes; slightly moist, compact |                   | SPT6   | 20-40-10      | 50          |                            |
| 7           |                                                                        |                   | SPT7   | 30-40-10      | 50          |                            |
| 8           |                                                                        |                   | SPT8   | 25-35-15      | 50          |                            |
| 9           |                                                                        |                   | SPT9   | 28-32-18      | 50          |                            |
| 10          |                                                                        |                   | SPT10  | 30-38-12      | 50          |                            |
| 11          |                                                                        |                   | SPT11  | 27-42-8       | 50          |                            |
| 12          |                                                                        |                   | SPT12  | 30-45-5       | 50          |                            |

Notes :
