# Supplementary material
Source: Research Square preprint supplement (doi:10.21203/rs.3.rs-8944437/v1)
Supplement: Supplementary file 3 [file 80203186a6f67b299cb0e2e2.pdf]

| OVERVIEW OF LABORATORY TEST RESULTS |                                         |          |                 |                    |                                                      |       |       |        |        |        |        |        |                 |       |       |                                   |                              |                                  |                        |                                              |
|-------------------------------------|-----------------------------------------|----------|-----------------|--------------------|------------------------------------------------------|-------|-------|--------|--------|--------|--------|--------|-----------------|-------|-------|-----------------------------------|------------------------------|----------------------------------|------------------------|----------------------------------------------|
| No                                  | Location                                | Borehole | Sample No       | Sampling depth (m) | Sieve Analysis                                       |       |       |        |        |        |        |        | Atterberg Limit |       |       | Bulk density (g/cm <sup>3</sup> ) | Natural moisture content (%) | Dry density (g/cm <sup>3</sup> ) | Consistency Index (CI) | Unified Soil Classification According (Uses) |
|                                     |                                         |          |                 |                    | % passing in sieves with squared shape openings (mm) |       |       |        |        |        |        |        | LL %            | PL %  | PI %  |                                   |                              |                                  |                        |                                              |
|                                     |                                         |          |                 |                    | 0.075                                                | 0.400 | 2.000 | 4.750  | 9.000  | 25.000 | 50.000 | 75.000 |                 |       |       |                                   |                              |                                  |                        |                                              |
| 1                                   | Bugesera, Nyanza and Cisagara districts | BH1      | BTP/014/02/2025 | 2.00               | 28.71                                                | 37.79 | 50.62 | 78.06  | 91.16  | 100.00 | 100.00 | 100.00 | 36.03           | 22.49 | 13.54 | 2.69                              | 12.28                        | 2.40                             | 1.75                   | SC; Clayey sand with gravel                  |
| 2                                   |                                         |          | BTP/015/02/2025 | 4.00               | 41.88                                                | 51.34 | 67.85 | 92.15  | 97.71  | 100.00 | 100.00 | 100.00 | 36.57           | 21.27 | 15.29 | 2.59                              | 17.10                        | 2.21                             | 1.27                   | SC; Clayey sand                              |
| 3                                   |                                         | BH2      | BTP/016/02/2025 | 2.00               | 38.43                                                | 57.77 | 75.00 | 87.04  | 92.96  | 100.00 | 100.00 | 100.00 | 33.42           | 20.97 | 12.45 | 2.25                              | 17.49                        | 1.91                             | 1.28                   | SC; Clayey sand                              |
| 4                                   |                                         |          | BTP/017/02/2025 | 4.00               | 43.92                                                | 57.35 | 75.02 | 93.84  | 97.98  | 100.00 | 100.00 | 100.00 | 34.03           | 20.42 | 13.61 | 2.39                              | 18.23                        | 2.02                             | 1.16                   | SC; Clayey sand                              |
| 5                                   |                                         | BH3      | BTP/018/02/2025 | 2.00               | 94.61                                                | 97.02 | 99.53 | 100.00 | 100.00 | 100.00 | 100.00 | 100.00 | 45.26           | 28.14 | 17.12 | 1.55                              | 31.58                        | 1.18                             | 0.80                   | CL; Sandy lean clay                          |
| 6                                   |                                         |          | BTP/019/02/2025 | 4.00               | 75.01                                                | 81.36 | 85.91 | 88.46  | 93.36  | 100.00 | 100.00 | 100.00 | 44.39           | 28.00 | 16.39 | 2.16                              | 33.13                        | 1.62                             | 0.69                   | CL; Sandy lean clay                          |
| 7                                   |                                         | BH4      | BTP/020/02/2025 | 2.00               | 66.99                                                | 77.94 | 83.65 | 89.67  | 93.54  | 100.00 | 100.00 | 100.00 | 43.07           | 26.76 | 16.31 | 2.36                              | 20.91                        | 1.95                             | 1.36                   | CL; Sandy lean clay                          |
| 8                                   |                                         |          | BTP/021/02/2025 | 4.00               | 72.76                                                | 92.59 | 97.34 | 100.00 | 100.00 | 100.00 | 100.00 | 100.00 | 36.9            | 20.4  | 16.5  | 2.4                               | 14.1                         | 2.12                             | 1.38                   | CL; Sandy lean clay                          |
| 9                                   |                                         | BH5      | BTP/022/02/2025 | 2.00               | 47.37                                                | 85.11 | 95.39 | 99.42  | 100.00 | 100.00 | 100.00 | 100.00 | 34.10           | 19.07 | 15.03 | 2.34                              | 15.85                        | 2.02                             | 1.21                   | SC; Clayey sand                              |
| 10                                  |                                         |          | BTP/023/02/2025 | 4.00               | 59.31                                                | 81.97 | 90.00 | 96.84  | 98.60  | 100.00 | 100.00 | 100.00 | 34.43           | 18.73 | 15.69 | 2.23                              | 15.08                        | 1.94                             | 1.23                   | CL; Sandy lean clay                          |
| 11                                  |                                         | BH6      | BTP/024/02/2025 | 2.00               | 74.55                                                | 89.89 | 98.40 | 100.00 | 100.00 | 100.00 | 100.00 | 100.00 | 42.91           | 26.49 | 16.42 | 2.32                              | 19.72                        | 1.94                             | 1.41                   | CL; Sandy lean clay                          |
| 12                                  |                                         |          | BTP/025/02/2025 | 4.00               | 60.50                                                | 81.71 | 98.54 | 100.00 | 100.00 | 100.00 | 100.00 | 100.00 | 42.24           | 27.11 | 15.13 | 2.06                              | 18.42                        | 1.74                             | 1.57                   | CL; Sandy lean clay                          |
| 13                                  |                                         | BH7      | BTP/026/02/2025 | 2.00               | 54.54                                                | 62.82 | 88.55 | 98.56  | 100.00 | 100.00 | 100.00 | 100.00 | 40.21           | 24.14 | 16.07 | 2.40                              | 21.00                        | 1.98                             | 1.20                   | CL; Sandy lean clay                          |
| 14                                  |                                         |          | BTP/027/02/2025 | 4.00               | 37.42                                                | 51.26 | 86.24 | 95.64  | 98.45  | 100.00 | 100.00 | 100.00 | 37.73           | 23.94 | 13.78 | 2.03                              | 21.21                        | 1.68                             | 1.20                   | SC; Clayey sand                              |

**RINCENT BTP RWANDA**

**SOIL ANALYSIS**

|                                    |                                             |                     |                                |
|------------------------------------|---------------------------------------------|---------------------|--------------------------------|
| <b>Researcher</b>                  | IRADUKUNDA Jeremie                          | <b>Sample ID</b>    | BTP/014/02/2025                |
| <b>Project</b>                     | BUGESERA - NYANZA - MAMBA TRANSMISSION LINE | <b>Testing date</b> | 5 February to 19 February 2025 |
| <b>Location</b>                    | Bugesera District                           | <b>Depth (m)</b>    | 2.0                            |
| <b>Date sample received in Lab</b> | 01 February 2025                            |                     |                                |
| <b>Borehole No</b>                 | BH1                                         |                     |                                |

|                          |       |       |
|--------------------------|-------|-------|
| Bulk density             | g/Cm³ | 2.69  |
| Natural Moisture content | W(n)% | 12.28 |

| SIEVE ANALYSIS        |        |       |       |       |       |        |        |        | LIQUIDITY LIMIT "WL" in penetrometer |              |              |       |       |       | PLASTICITY LIMIT |            |       |       |
|-----------------------|--------|-------|-------|-------|-------|--------|--------|--------|--------------------------------------|--------------|--------------|-------|-------|-------|------------------|------------|-------|-------|
| Sieve Size (mm)       | 0.0750 | 0.400 | 2.000 | 4.750 | 9.000 | 25.000 | 50.000 | 75.000 | Pen (mm)                             | 24.08        | 22.83        | 20.15 | 18.05 | 16.33 | correl.          | 22.36      | 22.86 | 22.24 |
| % Passing             | 28.71  | 37.79 | 50.6  | 78.1  | 91.2  | 100.0  | 100.0  | 100.0  | W%                                   | 38.02        | 37.08        | 36.33 | 35.71 | 33.71 | 0.96             |            |       |       |
| cumulative weight (g) | 236.2  | 206.1 | 163.6 | 72.7  | 29.3  | 0      | 0      | 0      | WL                                   | WP           | Ip           | CI    |       |       |                  |            |       |       |
|                       |        |       |       |       |       |        |        |        | <b>36.03</b>                         | <b>22.49</b> | <b>13.54</b> |       |       |       | CI=              | (WL-Wn)/PI |       |       |

**Sieve analysis Curve**

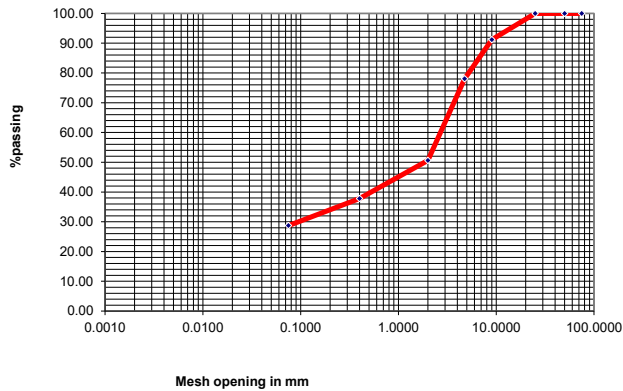

**Atterberg limit curve**

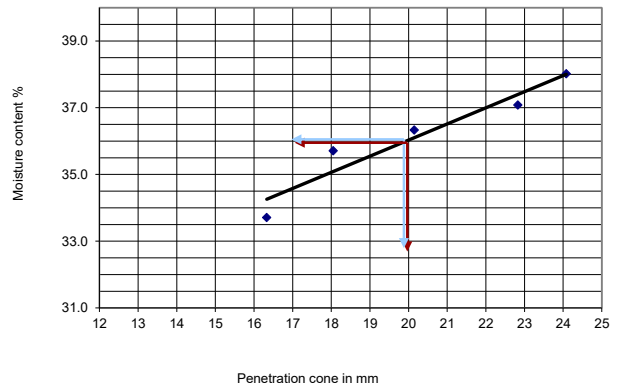

| Particle content | Silty | Sand  | Gravels |
|------------------|-------|-------|---------|
| %                | 28.71 | 49.35 | 21.94   |

|  |  |  |  |
|--|--|--|--|
|  |  |  |  |
|  |  |  |  |

**RINCENT BTP RWANDA**

**SOIL ANALYSIS**

|                                    |                                             |                     |                                |
|------------------------------------|---------------------------------------------|---------------------|--------------------------------|
| <b>Researcher</b>                  | IRADUKUNDA Jeremie                          | <b>Sample ID</b>    | BTP/015/02/2025                |
| <b>Project</b>                     | BUGESERA - NYANZA - MAMBA TRANSMISSION LINE | <b>Testing date</b> | 5 February to 19 February 2025 |
| <b>Location</b>                    | Bugesera District                           | <b>Depth (m)</b>    | 4.0                            |
| <b>Date sample received in Lab</b> | 01 February 2025                            |                     |                                |
| <b>Borehole No</b>                 | BH1                                         |                     |                                |

|                          |  |       |       |
|--------------------------|--|-------|-------|
| Bulk density             |  | g/Cm³ | 2.59  |
| Natural Moisture content |  | W(n)% | 17.10 |

###

| SIEVE ANALYSIS        |        |       |       |       |       |        |        |        | LIQUIDITY LIMIT "WL" in penetrometer |              |              |       |       |       | PLASTICITY LIMIT |            |       |       |
|-----------------------|--------|-------|-------|-------|-------|--------|--------|--------|--------------------------------------|--------------|--------------|-------|-------|-------|------------------|------------|-------|-------|
| Sieve Size (mm)       | 0.0750 | 0.400 | 2.000 | 4.750 | 9.000 | 25.000 | 50.000 | 75.000 | Pen (mm)                             | 23.56        | 21.36        | 19.51 | 17.11 | 15.33 | correl.          | 21.38      | 21.77 | 20.67 |
| % Passing             | 41.88  | 51.34 | 67.8  | 92.2  | 97.7  | 100.0  | 100.0  | 100.0  | W%                                   | 39.27        | 37.19        | 35.88 | 34.52 | 33.96 | 0.98             |            |       |       |
| cumulative weight (g) | 241.5  | 202.2 | 133.6 | 32.6  | 9.5   | 0      | 0      | 0      | WL                                   | WP           | Ip           | CI    |       |       |                  |            |       |       |
|                       |        |       |       |       |       |        |        |        | <b>36.57</b>                         | <b>21.27</b> | <b>15.29</b> |       |       |       | CI=              | (WL-Wn)/PI |       |       |

**Sieve analysis Curve**

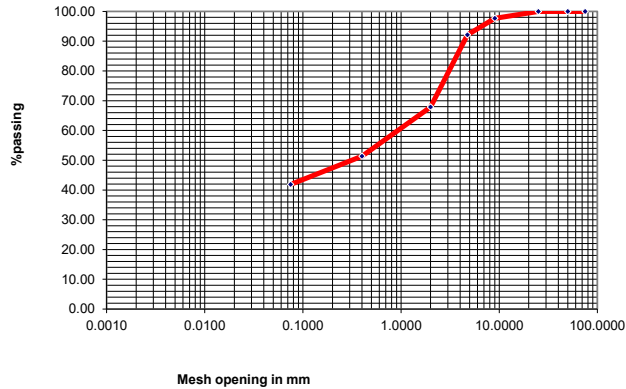

**Atterberg limit curve**

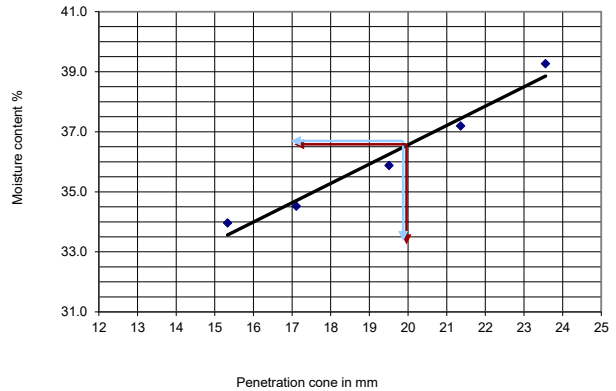

| Particle content | Silty | Sand  | Gravels |
|------------------|-------|-------|---------|
| %                | 41.88 | 50.28 | 7.85    |

RINCENT BTP RWANDA

|  |  |  |  |
|--|--|--|--|
|  |  |  |  |
|  |  |  |  |

RINCENT BTP RWANDA

SOIL ANALYSIS

|                                    |                                             |                     |                                |
|------------------------------------|---------------------------------------------|---------------------|--------------------------------|
| <b>Researcher</b>                  | IRADUKUNDA Jeremie                          | <b>Sample ID</b>    | BTP/016/02/2025                |
| <b>Project</b>                     | BUGESERA - NYANZA - MAMBA TRANSMISSION LINE | <b>Testing date</b> | 5 February to 19 February 2025 |
| <b>Location</b>                    | Bugesera District                           | <b>Depth (m)</b>    | 2.0                            |
| <b>Date sample received in Lab</b> | 01 February 2025                            |                     |                                |
| <b>Borehole No</b>                 | BH2                                         |                     |                                |

|                          |                   |       |
|--------------------------|-------------------|-------|
| Bulk density             | g/Cm <sup>3</sup> | 2.25  |
| Natural Moisture content | W(n)%             | 17.49 |

###

| SIEVE ANALYSIS        |        |       |       |       |       |        |        |        | LIQUIDITY LIMIT "WL" in penetrometer |       |       |       |       |       | PLASTICITY LIMIT |            |       |       |
|-----------------------|--------|-------|-------|-------|-------|--------|--------|--------|--------------------------------------|-------|-------|-------|-------|-------|------------------|------------|-------|-------|
| Sieve Size (mm)       | 0.0750 | 0.400 | 2.000 | 4.750 | 9.000 | 25.000 | 50.000 | 75.000 | Pen (mm)                             | 24.50 | 22.67 | 20.80 | 18.23 | 16.34 | correl.          | 21.43      | 21.48 | 20.00 |
| % Passing             | 38.43  | 57.77 | 75.0  | 87.0  | 93.0  | 100.0  | 100.0  | 100.0  | W%                                   | 35.45 | 34.32 | 33.66 | 32.88 | 31.83 | 0.99             |            |       |       |
| cumulative weight (g) | 235.2  | 161.3 | 95.5  | 49.5  | 26.9  | 0      | 0      | 0      | WL                                   |       | WP    | Ip    | CI    |       |                  |            |       |       |
|                       |        |       |       |       |       |        |        |        |                                      | 33.42 | 20.97 | 12.45 |       |       | CI=              | (WL-Wn)/PI |       |       |

Sieve analysis Curve

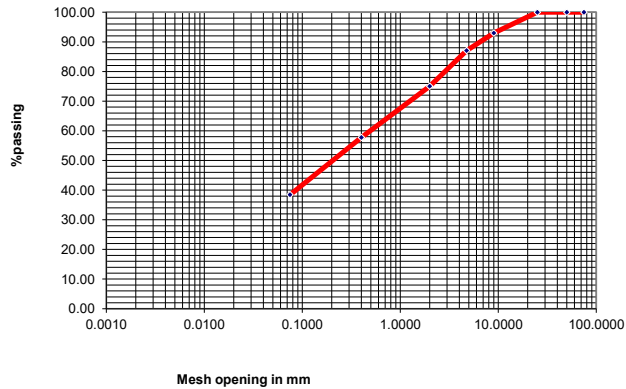

Atterberg limit curve

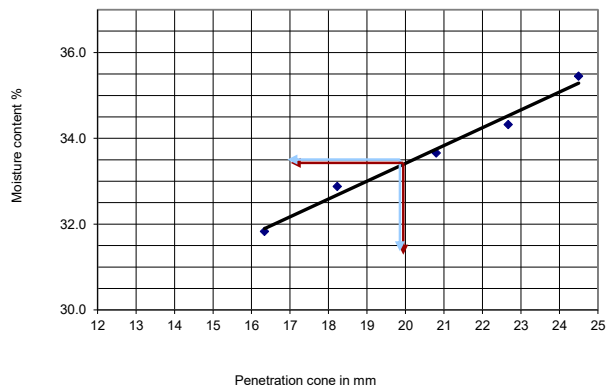

| Particle content | Silty | Sand  | Gravels |
|------------------|-------|-------|---------|
| %                | 38.43 | 48.61 | 12.96   |

RINCENT BTP RWANDA

|  |  |  |  |
|--|--|--|--|
|  |  |  |  |
|  |  |  |  |

**RINCENT BTP RWANDA**

**SOIL ANALYSIS**

|                                    |                                             |                     |                                |
|------------------------------------|---------------------------------------------|---------------------|--------------------------------|
| <b>Researcher</b>                  | IRADUKUNDA Jeremie                          | <b>Sample ID</b>    | BTP/017/02/2025                |
| <b>Project</b>                     | BUGESERA - NYANZA - MAMBA TRANSMISSION LINE | <b>Testing date</b> | 5 February to 19 February 2025 |
| <b>Location</b>                    | Bugesera District                           | <b>Depth (m)</b>    | 4.0                            |
| <b>Date sample received in Lab</b> | 01 February 2025                            |                     |                                |
| <b>Borehole No</b>                 | BH2                                         |                     |                                |

|                          |       |       |
|--------------------------|-------|-------|
| Bulk density             | g/Cm³ | 2.39  |
| Natural Moisture content | W(n)% | 18.23 |

###

| SIEVE ANALYSIS        |        |       |       |       |       |        |        | LIQUIDITY LIMIT "WL" in penetrometer |              |              |              |       |       | PLASTICITY LIMIT |         |            |       |       |
|-----------------------|--------|-------|-------|-------|-------|--------|--------|--------------------------------------|--------------|--------------|--------------|-------|-------|------------------|---------|------------|-------|-------|
| Sieve Size (mm)       | 0.0750 | 0.400 | 2.000 | 4.750 | 9.000 | 25.000 | 50.000 | 75.000                               | Pen (mm)     | 23.02        | 21.96        | 19.66 | 17.02 | 15.14            | correl. | 21.13      | 20.92 | 19.21 |
| % Passing             | 43.92  | 57.35 | 75.0  | 93.8  | 98.0  | 100.0  | 100.0  | 100.0                                | W%           | 36.75        | 34.19        | 33.79 | 32.14 | 31.40            | 0.94    |            |       |       |
| cumulative weight (g) | 172    | 130.8 | 76.6  | 18.9  | 6.2   | 0      | 0      | 0                                    | WL           | WP           | Ip           | CI    |       |                  |         |            |       |       |
|                       |        |       |       |       |       |        |        |                                      | <b>34.03</b> | <b>20.42</b> | <b>13.61</b> |       |       |                  | CI=     | (WL-Wn)/PI |       |       |

**Sieve analysis Curve**

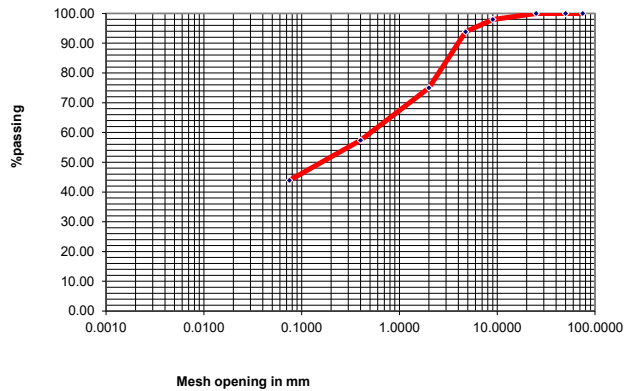

**Atterberg limit curve**

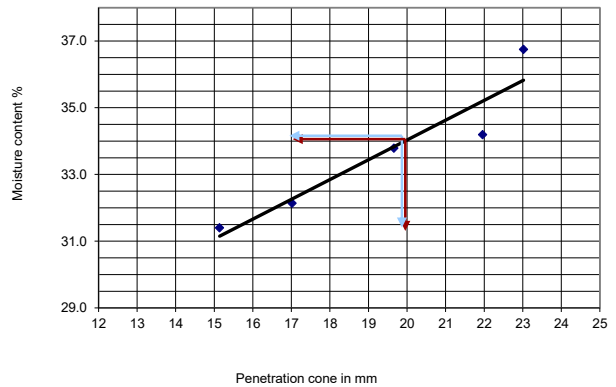

|                         |              |             |                |
|-------------------------|--------------|-------------|----------------|
| <b>Particle content</b> | <b>Silty</b> | <b>Sand</b> | <b>Gravels</b> |
| %                       | 43.92        | 49.92       | 6.16           |

RINCENT BTP RWANDA

|  |  |  |  |
|--|--|--|--|
|  |  |  |  |
|  |  |  |  |

RINCENT BTP RWANDA

SOIL ANALYSIS

|                                    |                                             |                     |                                |
|------------------------------------|---------------------------------------------|---------------------|--------------------------------|
| <b>Researcher</b>                  | IRADUKUNDA Jeremie                          | <b>Sample ID</b>    | BTP/018/02/2025                |
| <b>Project</b>                     | BUGESERA - NYANZA - MAMBA TRANSMISSION LINE | <b>Testing date</b> | 5 February to 19 February 2025 |
| <b>Location</b>                    | Bugesera District                           | <b>Depth (m)</b>    | 2.0                            |
| <b>Date sample received in Lab</b> | 01 February 2025                            |                     |                                |
| <b>Borehole No</b>                 | BH3                                         |                     |                                |

|                          |                   |       |
|--------------------------|-------------------|-------|
| Bulk density             | g/Cm <sup>3</sup> | 1.55  |
| Natural Moisture content | W(n)%             | 31.58 |

###

| SIEVE ANALYSIS        |        |       |       |       |       |        |        |        | LIQUIDITY LIMIT "WL" in penetrometer |       |       |       |       |       |         | PLASTICITY LIMIT |       |       |
|-----------------------|--------|-------|-------|-------|-------|--------|--------|--------|--------------------------------------|-------|-------|-------|-------|-------|---------|------------------|-------|-------|
| Sieve Size (mm)       | 0.0750 | 0.400 | 2.000 | 4.750 | 9.000 | 25.000 | 50.000 | 75.000 | Pen (mm)                             | 24.16 | 22.78 | 20.45 | 18.17 | 16.20 | correl. | 27.71            | 28.30 | 28.41 |
| % Passing             | 94.61  | 97.02 | 99.5  | 100.0 | 100.0 | 100.0  | 100.0  | 100.0  | W%                                   | 47.48 | 46.98 | 45.36 | 44.76 | 42.74 | 0.98    |                  |       |       |
| cumulative weight (g) | 21.7   | 12    | 1.9   | 0     | 0     | 0      | 0      | 0      | WL                                   | WP    | Ip    | CI    |       |       |         |                  |       |       |
|                       |        |       |       |       |       |        |        |        | 45.26                                | 28.14 | 17.12 |       |       |       | CI=     | (WL-Wn)/PI       |       |       |

Sieve analysis Curve

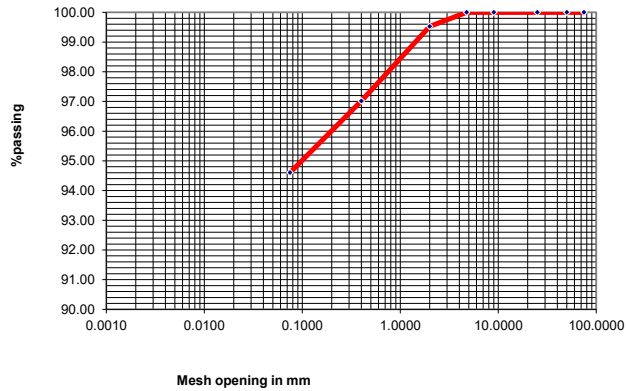

Atterberg limit curve

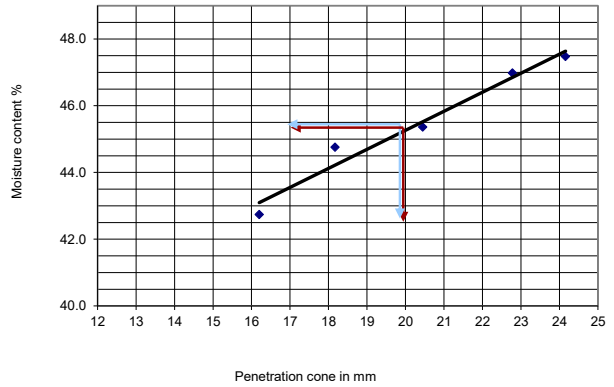

| Particle content | Silty | Sand | Gravels |
|------------------|-------|------|---------|
| %                | 94.61 | 5.39 | 0.00    |

RINCENT BTP RWANDA

|  |  |  |  |
|--|--|--|--|
|  |  |  |  |
|  |  |  |  |

**RINCENT BTP RWANDA**

**SOIL ANALYSIS**

|                                    |                                             |                     |                                |
|------------------------------------|---------------------------------------------|---------------------|--------------------------------|
| <b>Researcher</b>                  | IRADUKUNDA Jeremie                          | <b>Sample ID</b>    | BTP/019/02/2025                |
| <b>Project</b>                     | BUGESERA - NYANZA - MAMBA TRANSMISSION LINE | <b>Testing date</b> | 5 February to 19 February 2025 |
| <b>Location</b>                    | Bugesera District                           | <b>Depth (m)</b>    | 4.0                            |
| <b>Date sample received in Lab</b> | 01 February 2025                            |                     |                                |
| <b>Borehole No</b>                 | BH3                                         |                     |                                |

|                          |                   |       |
|--------------------------|-------------------|-------|
| Bulk density             | g/Cm <sup>3</sup> | 2.16  |
| Natural Moisture content | W(n)%             | 33.13 |

###

| SIEVE ANALYSIS        |        |       |       |       |       |        |        |        | LIQUIDITY LIMIT "WL" in penetrometer |              |              |       |       |       | PLASTICITY LIMIT |            |       |       |
|-----------------------|--------|-------|-------|-------|-------|--------|--------|--------|--------------------------------------|--------------|--------------|-------|-------|-------|------------------|------------|-------|-------|
| Sieve Size (mm)       | 0.0750 | 0.400 | 2.000 | 4.750 | 9.000 | 25.000 | 50.000 | 75.000 | Pen (mm)                             | 24.14        | 22.75        | 20.44 | 18.16 | 16.14 | correl.          | 28.14      | 28.86 | 27.00 |
| % Passing             | 75.01  | 81.36 | 85.9  | 88.5  | 93.4  | 100.0  | 100.0  | 100.0  | W%                                   | 46.91        | 45.24        | 44.93 | 43.28 | 42.43 | 0.98             |            |       |       |
| cumulative weight (g) | 77.5   | 57.8  | 43.7  | 35.8  | 20.6  | 0      | 0      | 0      | WL                                   | WP           | Ip           | CI    |       |       |                  |            |       |       |
|                       |        |       |       |       |       |        |        |        | <b>44.39</b>                         | <b>28.00</b> | <b>16.39</b> |       |       |       | CI=              | (WL-Wn)/PI |       |       |

**Sieve analysis Curve**

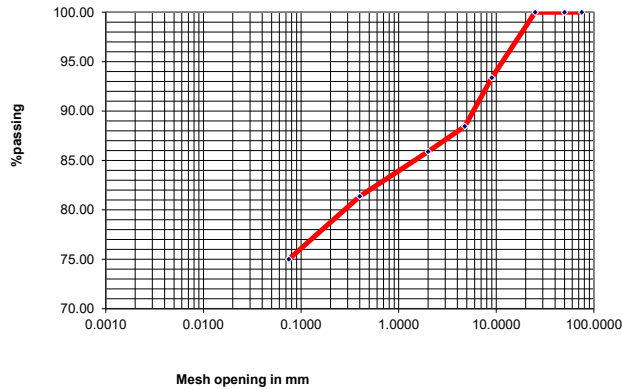

**Atterberg limit curve**

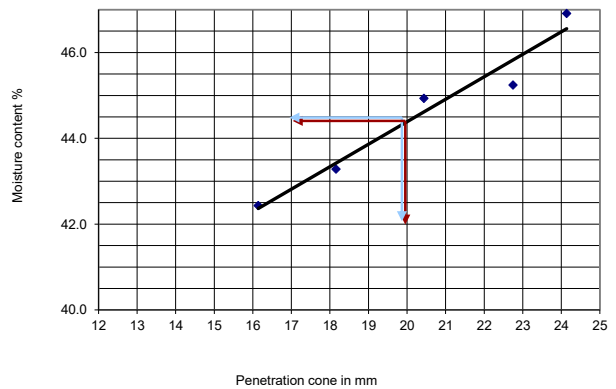

| Particle content | Silty | Sand  | Gravels |
|------------------|-------|-------|---------|
| %                | 75.01 | 13.45 | 11.54   |

**RINCENT BTP RWANDA**

|  |  |  |  |
|--|--|--|--|
|  |  |  |  |
|  |  |  |  |

RINCENT BTP RWANDA

SOIL ANALYSIS

|                                    |                                             |                     |                                |
|------------------------------------|---------------------------------------------|---------------------|--------------------------------|
| <b>Researcher</b>                  | IRADUKUNDA Jeremie                          | <b>Sample ID</b>    | BTP/020/02/2025                |
| <b>Project</b>                     | BUGESERA - NYANZA - MAMBA TRANSMISSION LINE | <b>Testing date</b> | 5 February to 19 February 2025 |
| <b>Location</b>                    | Nyanza District                             | <b>Depth (m)</b>    | 2.0                            |
| <b>Date sample received in Lab</b> | 01 February 2025                            |                     |                                |
| <b>Borehole No</b>                 | BH4                                         |                     |                                |

|                          |                   |       |
|--------------------------|-------------------|-------|
| Bulk density             | g/Cm <sup>3</sup> | 2.36  |
| Natural Moisture content | W(n)%             | 20.91 |

###

| SIEVE ANALYSIS        | LIQUIDITY LIMIT "WL" in penetrometer |       |       |       |       |        |        |        |              |              | PLASTICITY LIMIT |       |       |       |         |            |       |       |
|-----------------------|--------------------------------------|-------|-------|-------|-------|--------|--------|--------|--------------|--------------|------------------|-------|-------|-------|---------|------------|-------|-------|
| Sieve Size (mm)       | 0.0750                               | 0.400 | 2.000 | 4.750 | 9.000 | 25.000 | 50.000 | 75.000 | Pen (mm)     | 24.79        | 22.00            | 20.42 | 18.98 | 16.20 | correl. | 25.28      | 27.43 | 27.57 |
| % Passing             | 66.99                                | 77.94 | 83.7  | 89.7  | 93.5  | 100.0  | 100.0  | 100.0  | W%           | 45.36        | 44.07            | 43.22 | 42.11 | 41.67 | 0.98    |            |       |       |
| cumulative weight (g) | 136.5                                | 91.2  | 67.6  | 42.7  | 26.7  | 0      | 0      | 0      | WL           | WP           | Ip               | CI    |       |       |         |            |       |       |
|                       |                                      |       |       |       |       |        |        |        | <b>43.07</b> | <b>26.76</b> | <b>16.31</b>     |       |       |       | CI=     | (WL-Wn)/PI |       |       |

Sieve analysis Curve

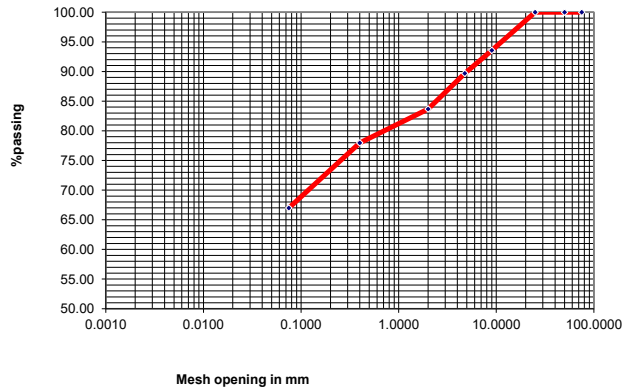

Atterberg limit curve

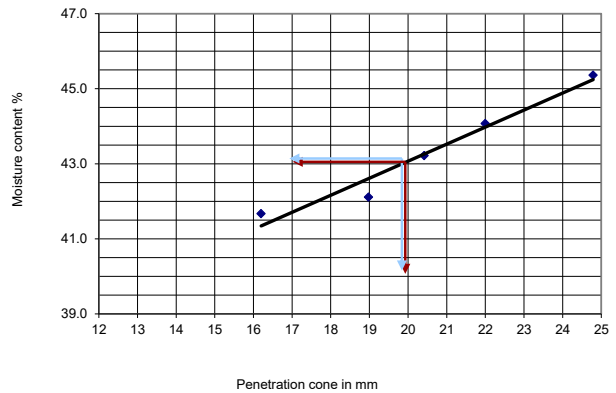

| Particle content | Silty | Sand  | Gravels |
|------------------|-------|-------|---------|
| %                | 66.99 | 22.68 | 10.33   |

RINCENT BTP RWANDA

|  |  |  |  |
|--|--|--|--|
|  |  |  |  |
|  |  |  |  |

RINCENT BTP RWANDA

SOIL ANALYSIS

|                                    |                                             |                     |                                |
|------------------------------------|---------------------------------------------|---------------------|--------------------------------|
| <b>Researcher</b>                  | IRADUKUNDA Jeremie                          | <b>Sample ID</b>    | BTP/021/02/2025                |
| <b>Project</b>                     | BUGESERA - NYANZA - MAMBA TRANSMISSION LINE | <b>Testing date</b> | 5 February to 19 February 2025 |
| <b>Location</b>                    | Nyanza District                             | <b>Depth (m)</b>    | 4.0                            |
| <b>Date sample received in Lab</b> | 01 February 2025                            |                     |                                |
| <b>Borehole No</b>                 | BH4                                         |                     |                                |

|                          |                   |       |
|--------------------------|-------------------|-------|
| Bulk density             | g/Cm <sup>3</sup> | 2.42  |
| Natural Moisture content | W(n)%             | 14.11 |

###

| SIEVE ANALYSIS        |        |       |       |       |       |        |        | LIQUIDITY LIMIT "WL" in penetrometer |              |              |              |       |       | PLASTICITY LIMIT |            |       |       |       |
|-----------------------|--------|-------|-------|-------|-------|--------|--------|--------------------------------------|--------------|--------------|--------------|-------|-------|------------------|------------|-------|-------|-------|
| Sieve Size (mm)       | 0.0750 | 0.400 | 2.000 | 4.750 | 9.000 | 25.000 | 50.000 | 75.000                               | Pen (mm)     | 23.53        | 21.02        | 19.26 | 17.28 | 15.86            | correl.    | 20.18 | 20.64 | 20.28 |
| % Passing             | 72.76  | 92.59 | 97.3  | 100.0 | 100.0 | 100.0  | 100.0  | 100.0                                | W%           | 38.83        | 37.98        | 36.32 | 35.17 | 34.26            | 0.99       |       |       |       |
| cumulative weight (g) | 52.2   | 14.2  | 5.1   | 0     | 0     | 0      | 0      | 0                                    | WL           | WP           | Ip           | CI    |       |                  |            |       |       |       |
|                       |        |       |       |       |       |        |        |                                      | <b>36.89</b> | <b>20.37</b> | <b>16.52</b> |       |       | CI=              | (WL-Wn)/PI |       |       |       |

Sieve analysis Curve

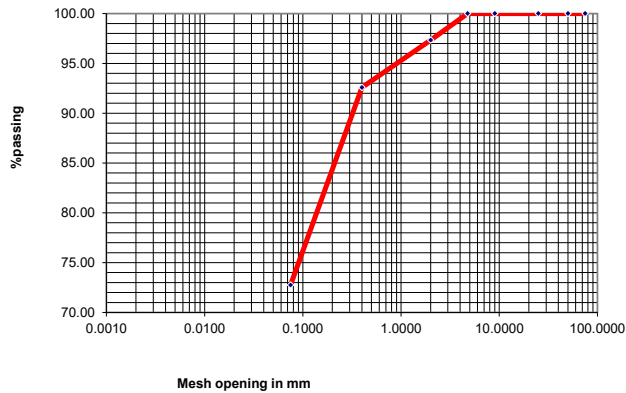

Atterberg limit curve

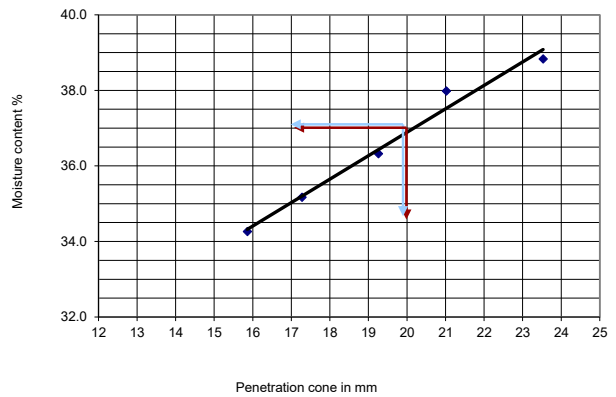

| Particle content | Silty | Sand  | Gravels |
|------------------|-------|-------|---------|
| %                | 72.76 | 27.24 | 0.00    |

RINCENT BTP RWANDA

|  |  |  |  |
|--|--|--|--|
|  |  |  |  |
|  |  |  |  |

**RINCENT BTP RWANDA**

**SOIL ANALYSIS**

|                                    |                                             |                     |                                |
|------------------------------------|---------------------------------------------|---------------------|--------------------------------|
| <b>Researcher</b>                  | IRADUKUNDA Jeremie                          | <b>Sample ID</b>    | BTP/022/02/2025                |
| <b>Project</b>                     | BUGESERA - NYANZA - MAMBA TRANSMISSION LINE | <b>Testing date</b> | 5 February to 19 February 2025 |
| <b>Location</b>                    | Nyanza District                             | <b>Depth (m)</b>    | 2.0                            |
| <b>Date sample received in Lab</b> | 01 February 2025                            |                     |                                |
| <b>Borehole No</b>                 | BH5                                         |                     |                                |

|                          |  |       |       |
|--------------------------|--|-------|-------|
| Bulk density             |  | g/Cm³ | 2.34  |
| Natural Moisture content |  | W(n)% | 15.85 |

| SIEVE ANALYSIS        |        |       |       |       |       |        |        |        | LIQUIDITY LIMIT "WL" in penetrometer |       |              |       |       |       | PLASTICITY LIMIT |            |       |       |
|-----------------------|--------|-------|-------|-------|-------|--------|--------|--------|--------------------------------------|-------|--------------|-------|-------|-------|------------------|------------|-------|-------|
| Sieve Size (mm)       | 0.0750 | 0.400 | 2.000 | 4.750 | 9.000 | 25.000 | 50.000 | 75.000 | Pen (mm)                             | 24.60 | 22.06        | 20.04 | 18.43 | 16.07 | correl.          | 19.10      | 18.81 | 19.29 |
| % Passing             | 47.37  | 85.11 | 95.4  | 99.4  | 100.0 | 100.0  | 100.0  | 100.0  | W%                                   | 36.22 | 35.53        | 34.13 | 33.06 | 32.16 | 0.99             |            |       |       |
| cumulative weight (g) | 163.3  | 46.2  | 14.3  | 1.8   | 0     | 0      | 0      | 0      | WL                                   | WP    | Ip           | CI    |       |       |                  |            |       |       |
|                       |        |       |       |       |       |        |        |        | <b>34.10</b>                         | 19.07 | <b>15.03</b> |       |       |       | CI=              | (WL-Wn)/PI |       |       |

**Sieve analysis Curve**

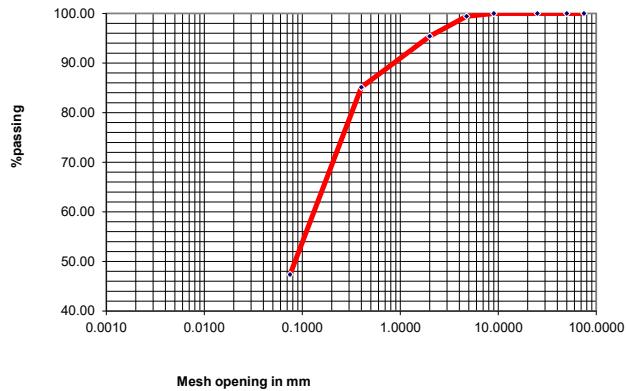

**Atterberg limit curve**

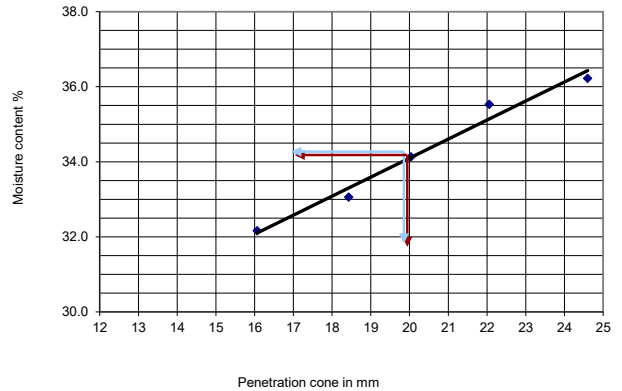

| Particle content | Silty | Sand  | Gravels |
|------------------|-------|-------|---------|
| %                | 47.37 | 52.05 | 0.58    |

|  |  |  |  |
|--|--|--|--|
|  |  |  |  |
|  |  |  |  |

**RINCENT BTP RWANDA**

**SOIL ANALYSIS**

|                                    |                                             |                     |                                |
|------------------------------------|---------------------------------------------|---------------------|--------------------------------|
| <b>Researcher</b>                  | IRADUKUNDA Jeremie                          | <b>Sample ID</b>    | BTP/023/02/2025                |
| <b>Project</b>                     | BUGESERA - NYANZA - MAMBA TRANSMISSION LINE | <b>Testing date</b> | 5 February to 19 February 2025 |
| <b>Location</b>                    | Nyanza District                             | <b>Depth (m)</b>    | 4.0                            |
| <b>Date sample received in Lab</b> | 01 February 2025                            |                     |                                |
| <b>Borehole No</b>                 | BH5                                         |                     |                                |

|                          |  |       |       |
|--------------------------|--|-------|-------|
| Bulk density             |  | g/Cm³ | 2.23  |
| Natural Moisture content |  | W(n)% | 15.08 |

###

| SIEVE ANALYSIS        |        |       |       |       |       |        |        |        | LIQUIDITY LIMIT "WL" in penetrometer |       |              |       |       |       | PLASTICITY LIMIT |            |       |       |
|-----------------------|--------|-------|-------|-------|-------|--------|--------|--------|--------------------------------------|-------|--------------|-------|-------|-------|------------------|------------|-------|-------|
| Sieve Size (mm)       | 0.0750 | 0.400 | 2.000 | 4.750 | 9.000 | 25.000 | 50.000 | 75.000 | Pen (mm)                             | 23.43 | 21.80        | 19.70 | 17.56 | 15.58 | correl.          | 18.10      | 19.81 | 18.29 |
| % Passing             | 59.31  | 81.97 | 90.0  | 96.8  | 98.6  | 100.0  | 100.0  | 100.0  | W%                                   | 36.22 | 35.53        | 34.13 | 33.06 | 32.16 | 1.00             |            |       |       |
| cumulative weight (g) | 185.5  | 82.2  | 45.6  | 14.4  | 6.4   | 0      | 0      | 0      | WL                                   | WP    | Ip           | CI    |       |       |                  |            |       |       |
|                       |        |       |       |       |       |        |        |        | <b>34.43</b>                         | 18.73 | <b>15.69</b> |       |       |       | CI=              | (WL-Wn)/PI |       |       |

**Sieve analysis Curve**

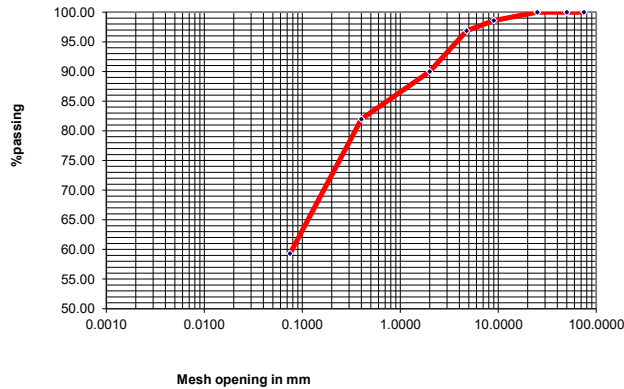

**Atterberg limit curve**

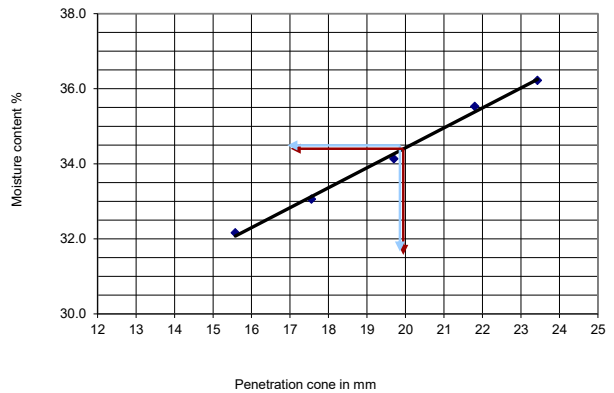

|                         |              |             |                |
|-------------------------|--------------|-------------|----------------|
| <b>Particle content</b> | <b>Silty</b> | <b>Sand</b> | <b>Gravels</b> |
| %                       | 59.31        | 37.53       | 3.16           |

RINCENT BTP RWANDA

|  |  |  |  |
|--|--|--|--|
|  |  |  |  |
|  |  |  |  |

**RINCENT BTP RWANDA**

**SOIL ANALYSIS**

|                                    |                                             |                     |                                |
|------------------------------------|---------------------------------------------|---------------------|--------------------------------|
| <b>Researcher</b>                  | IRADUKUNDA Jeremie                          | <b>Sample ID</b>    | BTP/024/02/2025                |
| <b>Project</b>                     | BUGESERA - NYANZA - MAMBA TRANSMISSION LINE | <b>Testing date</b> | 5 February to 19 February 2025 |
| <b>Location</b>                    | Nyanza District                             | <b>Depth (m)</b>    | 2.0                            |
| <b>Date sample received in Lab</b> | 01 February 2025                            |                     |                                |
| <b>Borehole No</b>                 | BH6                                         |                     |                                |

|                          |                   |       |
|--------------------------|-------------------|-------|
| Bulk density             | g/Cm <sup>3</sup> | 2.32  |
| Natural Moisture content | W(n)%             | 19.72 |

| SIEVE ANALYSIS        |        |       |       |       |       |        |        |        | LIQUIDITY LIMIT "WL" in penetrometer |              |              |       |       |       | PLASTICITY LIMIT |            |       |       |
|-----------------------|--------|-------|-------|-------|-------|--------|--------|--------|--------------------------------------|--------------|--------------|-------|-------|-------|------------------|------------|-------|-------|
| Sieve Size (mm)       | 0.0750 | 0.400 | 2.000 | 4.750 | 9.000 | 25.000 | 50.000 | 75.000 | Pen (mm)                             | 23.14        | 21.22        | 19.82 | 17.00 | 15.62 | correl.          | 26.41      | 26.91 | 26.16 |
| % Passing             | 74.55  | 89.89 | 98.4  | 100.0 | 100.0 | 100.0  | 100.0  | 100.0  | W%                                   | 44.67        | 43.33        | 42.90 | 41.25 | 40.73 | 1.00             |            |       |       |
| cumulative weight (g) | 63.7   | 25.3  | 4     | 0     | 0     | 0      | 0      | 0      | WL                                   | WP           | Ip           | CI    |       |       |                  |            |       |       |
|                       |        |       |       |       |       |        |        |        | <b>42.91</b>                         | <b>26.49</b> | <b>16.42</b> |       |       |       | CI=              | (WL-Wn)/PI |       |       |

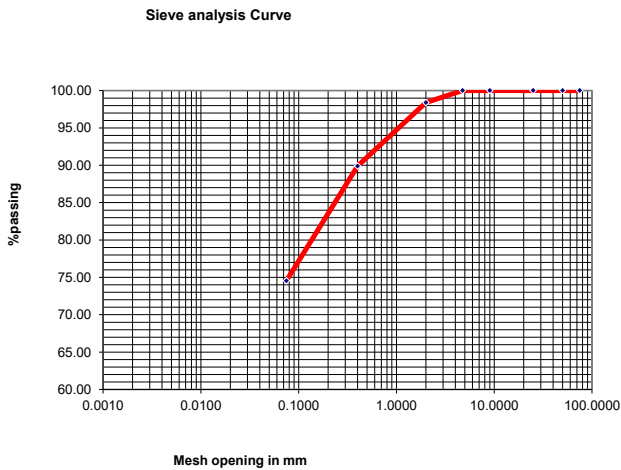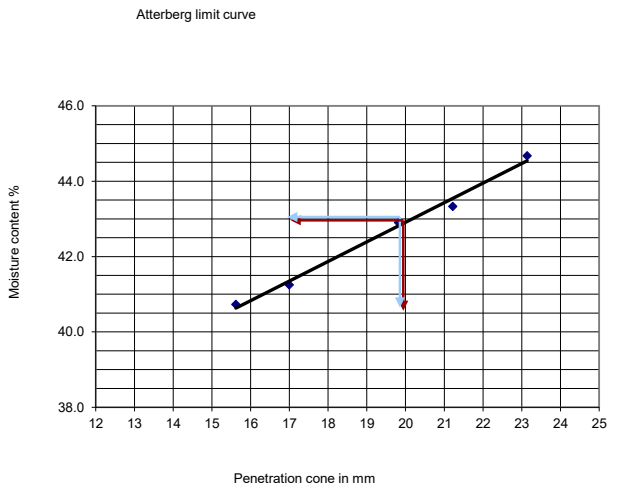

| Particle content | Silty | Sand  | Gravels |
|------------------|-------|-------|---------|
| %                | 74.55 | 25.45 | 0.00    |

|  |  |  |  |
|--|--|--|--|
|  |  |  |  |
|  |  |  |  |

**RINCENT BTP RWANDA**

**SOIL ANALYSIS**

|                                    |                                             |                     |                                |
|------------------------------------|---------------------------------------------|---------------------|--------------------------------|
| <b>Researcher</b>                  | IRADUKUNDA Jeremie                          | <b>Sample ID</b>    | BTP/025/02/2025                |
| <b>Project</b>                     | BUGESERA - NYANZA - MAMBA TRANSMISSION LINE | <b>Testing date</b> | 5 February to 19 February 2025 |
| <b>Location</b>                    | Nyanza District                             | <b>Depth (m)</b>    | 4.0                            |
| <b>Date sample received in Lab</b> | 01 February 2025                            |                     |                                |
| <b>Borehole No</b>                 | BH6                                         |                     |                                |

|                          |                   |       |
|--------------------------|-------------------|-------|
| Bulk density             | g/Cm <sup>3</sup> | 2.06  |
| Natural Moisture content | W(n)%             | 18.42 |

###

| SIEVE ANALYSIS        |        |       |       |       |       |        |        |        | LIQUIDITY LIMIT "WL" in penetrometer |              |              |       |       |       | PLASTICITY LIMIT |            |       |       |
|-----------------------|--------|-------|-------|-------|-------|--------|--------|--------|--------------------------------------|--------------|--------------|-------|-------|-------|------------------|------------|-------|-------|
| Sieve Size (mm)       | 0.0750 | 0.400 | 2.000 | 4.750 | 9.000 | 25.000 | 50.000 | 75.000 | Pen (mm)                             | 24.07        | 22.80        | 20.07 | 18.21 | 16.16 | correl.          | 26.25      | 27.47 | 27.62 |
| % Passing             | 60.50  | 81.71 | 98.5  | 100.0 | 100.0 | 100.0  | 100.0  | 100.0  | W%                                   | 45           | 44.40        | 43.33 | 40.20 | 39.29 | 0.97             |            |       |       |
| cumulative weight (g) | 113.8  | 52.7  | 4.2   | 0     | 0     | 0      | 0      | 0      | WL                                   | WP           | Ip           | CI    |       |       |                  |            |       |       |
|                       |        |       |       |       |       |        |        |        | <b>42.24</b>                         | <b>27.11</b> | <b>15.13</b> |       |       |       | CI=              | (WL-Wn)/PI |       |       |

**Sieve analysis Curve**

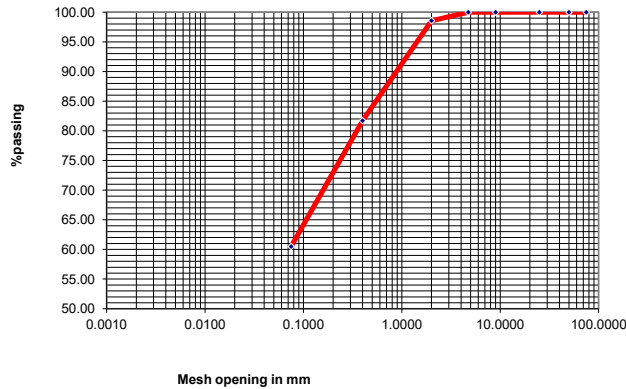

**Atterberg limit curve**

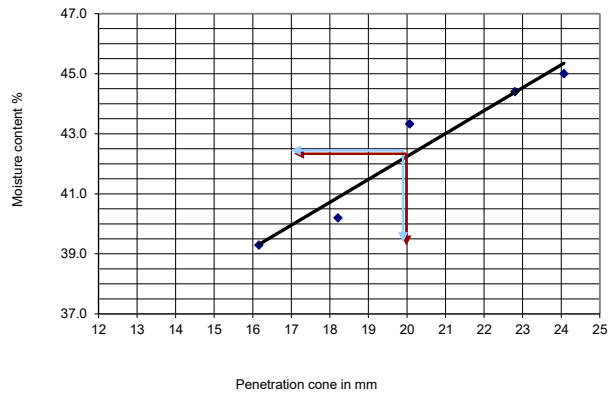

|                         |              |             |                |
|-------------------------|--------------|-------------|----------------|
| <b>Particle content</b> | <b>Silty</b> | <b>Sand</b> | <b>Gravels</b> |
| %                       | 60.50        | 39.50       | 0.00           |

RINCENT BTP RWANDA

|  |  |  |  |
|--|--|--|--|
|  |  |  |  |
|  |  |  |  |

**RINCENT BTP RWANDA**

**SOIL ANALYSIS**

|                                    |                                             |                     |                                |
|------------------------------------|---------------------------------------------|---------------------|--------------------------------|
| <b>Researcher</b>                  | IRADUKUNDA Jeremie                          | <b>Sample ID</b>    | BTP/026/02/2025                |
| <b>Project</b>                     | BUGESERA - NYANZA - MAMBA TRANSMISSION LINE | <b>Testing date</b> | 5 February to 19 February 2025 |
| <b>Location</b>                    | Gisagara District                           | <b>Depth (m)</b>    | 2.0                            |
| <b>Date sample received in Lab</b> | 01 February 2025                            |                     |                                |
| <b>Borehole No</b>                 | BH7                                         |                     |                                |

|                          |  |                   |       |
|--------------------------|--|-------------------|-------|
| Bulk density             |  | g/Cm <sup>3</sup> | 2.40  |
| Natural Moisture content |  | W(n)%             | 21.00 |

| SIEVE ANALYSIS        |        |       |       |       |       |        |        | LIQUIDITY LIMIT "WL" in penetrometer |          |       |       |       | PLASTICITY LIMIT |       |         |       |       |            |
|-----------------------|--------|-------|-------|-------|-------|--------|--------|--------------------------------------|----------|-------|-------|-------|------------------|-------|---------|-------|-------|------------|
| Sieve Size (mm)       | 0.0750 | 0.400 | 2.000 | 4.750 | 9.000 | 25.000 | 50.000 | 75.000                               | Pen (mm) | 24.85 | 22.15 | 20.68 | 18.23            | 16.30 | correl. | 25.35 | 23.57 | 23.50      |
| % Passing             | 54.54  | 62.82 | 88.5  | 98.6  | 100.0 | 100.0  | 100.0  | 100.0                                | W%       | 42.62 | 41.54 | 40.47 | 39.63            | 37.96 | 0.99    |       |       |            |
| cumulative weight (g) | 151.6  | 124   | 38.2  | 4.8   | 0     | 0      | 0      | 0                                    | WL       | 40.21 | 24.14 | 16.07 |                  |       |         |       |       |            |
|                       |        |       |       |       |       |        |        |                                      |          |       |       |       |                  |       | CI=     |       |       | (WL-Wn)/PI |

**Sieve analysis Curve**

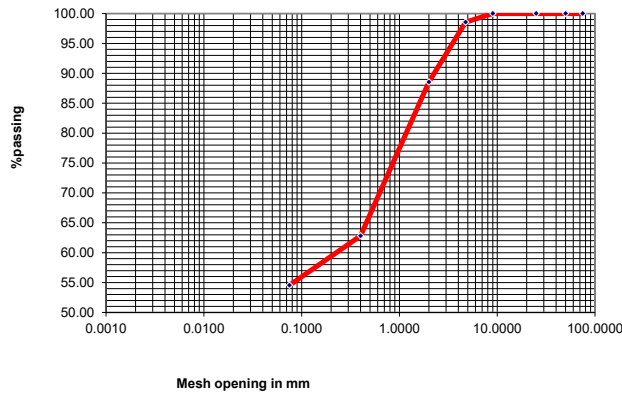

**Atterberg limit curve**

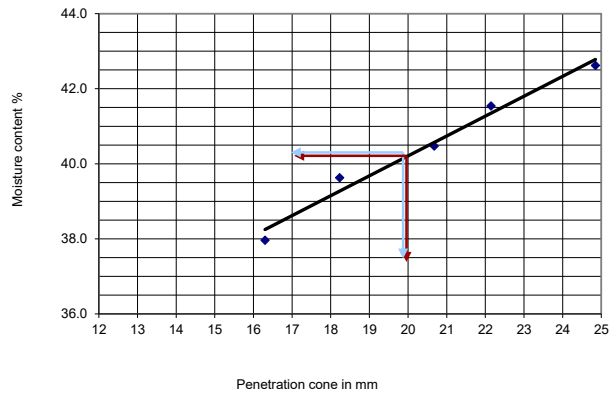

| Particle content | Silty | Sand  | Gravels |
|------------------|-------|-------|---------|
| %                | 54.54 | 44.02 | 1.44    |

|  |  |  |  |
|--|--|--|--|
|  |  |  |  |
|  |  |  |  |

**RINCENT BTP RWANDA**

**SOIL ANALYSIS**

|                                    |                                             |                     |                                |
|------------------------------------|---------------------------------------------|---------------------|--------------------------------|
| <b>Researcher</b>                  | IRADUKUNDA Jeremie                          | <b>Sample ID</b>    | BTP/027/02/2025                |
| <b>Project</b>                     | BUGESERA - NYANZA - MAMBA TRANSMISSION LINE | <b>Testing date</b> | 5 February to 19 February 2025 |
| <b>Location</b>                    | Gisagara District                           | <b>Depth (m)</b>    | 4.0                            |
| <b>Date sample received in Lab</b> | 01 February 2025                            |                     |                                |
| <b>Borehole No</b>                 | BH7                                         |                     |                                |

|                          |  |                   |       |
|--------------------------|--|-------------------|-------|
| Bulk density             |  | g/Cm <sup>3</sup> | 2.03  |
| Natural Moisture content |  | W(n)%             | 21.21 |

###

| SIEVE ANALYSIS        |        |       |       |       |       |        |        |        | LIQUIDITY LIMIT "WL" in penetrometer |       |              |       |       |       | PLASTICITY LIMIT |            |       |       |
|-----------------------|--------|-------|-------|-------|-------|--------|--------|--------|--------------------------------------|-------|--------------|-------|-------|-------|------------------|------------|-------|-------|
| Sieve Size (mm)       | 0.0750 | 0.400 | 2.000 | 4.750 | 9.000 | 25.000 | 50.000 | 75.000 | Pen (mm)                             | 23.90 | 21.25        | 19.16 | 17.00 | 15.02 | correl.          | 23.74      | 23.21 | 24.88 |
| % Passing             | 37.42  | 51.26 | 86.2  | 95.6  | 98.4  | 100.0  | 100.0  | 100.0  | W%                                   | 39.49 | 38.32        | 37.14 | 36.68 | 35.34 | 0.99             |            |       |       |
| cumulative weight (g) | 149.2  | 116.2 | 32.8  | 10.4  | 3.7   | 0      | 0      | 0      | WL                                   | WP    | Ip           | CI    |       |       |                  |            |       |       |
|                       |        |       |       |       |       |        |        |        | <b>37.73</b>                         | 23.94 | <b>13.78</b> |       |       |       | CI=              | (WL-Wn)/PI |       |       |

**Sieve analysis Curve**

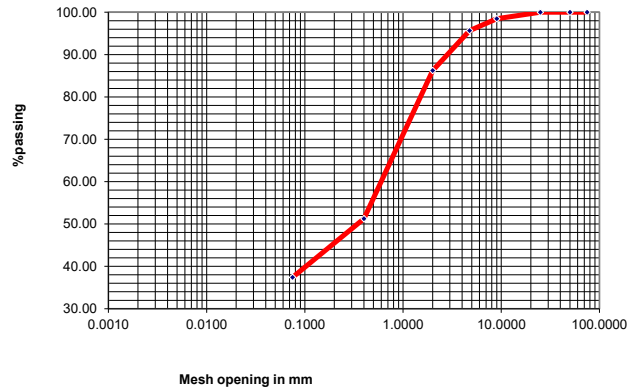

**Atterberg limit curve**

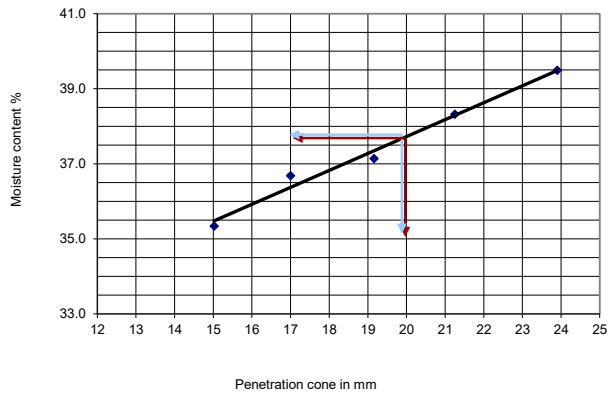

| Particle content | Silty | Sand  | Gravels |
|------------------|-------|-------|---------|
| %                | 37.42 | 58.22 | 4.36    |

RINCENT BTP RWANDA

|  |  |  |  |
|--|--|--|--|
|  |  |  |  |
|  |  |  |  |
