# Supplementary material
Source: Research Square preprint supplement (doi:10.21203/rs.3.rs-8944437/v1)
Supplement: Supplementary file 4 [file 8e02311bf02c5e392ba8b350.pdf]

| OVERVIEW OF RESULTS |                                         |          |                 |                    |          |                            |                                              |
|---------------------|-----------------------------------------|----------|-----------------|--------------------|----------|----------------------------|----------------------------------------------|
| No                  | Location                                | Borehole | Sample No       | Sampling depth (m) | Cohesion | Angle of Internal Friction | Unified Soil Classification According (Uses) |
|                     |                                         |          |                 |                    | (C) KPa  | (degree) $\phi$            |                                              |
| 1                   | Bugesera, Nyanza and Gisagara districts | BH1      | BTP/014/02/2025 | 2.00               | 13.92    | 29.68                      | SC; Clayey sand with gravel                  |
| 2                   |                                         |          | BTP/015/02/2025 | 4.00               | 13.92    | 34.06                      | SC; Clayey sand                              |
| 3                   |                                         | BH2      | BTP/016/02/2025 | 2.00               | 9.28     | 35.09                      | SC; Clayey sand                              |
| 4                   |                                         |          | BTP/017/02/2025 | 4.00               | 16.24    | 31.09                      | SC; Clayey sand                              |
| 5                   |                                         | BH3      | BTP/018/02/2025 | 2.00               | 9.28     | 16.26                      | CL; Sandy lean clay                          |
| 6                   |                                         |          | BTP/019/02/2025 | 4.00               | 18.56    | 32.73                      | CL; Sandy lean clay                          |
| 7                   |                                         | BH4      | BTP/020/02/2025 | 2.00               | 20.88    | 28.81                      | CL; Sandy lean clay                          |
| 8                   |                                         |          | BTP/021/02/2025 | 4.00               | 24.35    | 30.95                      | CL; Sandy lean clay                          |
| 9                   |                                         | BH5      | BTP/022/02/2025 | 2.00               | 18.56    | 37.31                      | SC; Clayey sand                              |
| 10                  |                                         |          | BTP/023/02/2025 | 4.00               | 23.19    | 31.09                      | CL; Sandy lean clay                          |
| 11                  |                                         | BH6      | BTP/024/02/2025 | 2.00               | 16.24    | 34.32                      | CL; Sandy lean clay                          |
| 12                  |                                         |          | BTP/025/02/2025 | 4.00               | 23.19    | 38.49                      | CL; Sandy lean clay                          |
| 13                  |                                         | BH7      | BTP/026/02/2025 | 2.00               | 27.83    | 31.92                      | CL; Sandy lean clay                          |
| 14                  |                                         |          | BTP/027/02/2025 | 4.00               | 13.92    | 35.59                      | SC; Clayey sand                              |

DIRECT SHEAR TEST ACCORDIND TO ASTM D 3080

|                                    |                                             |                     |                                |
|------------------------------------|---------------------------------------------|---------------------|--------------------------------|
| <b>Reseacher</b>                   | IRADULUNDA Jeremie                          | <b>Sample ID</b>    | BTP/014/02/2025                |
| <b>Project</b>                     | BUGESERA - NYANZA - MAMBA TRANSMISSION LINE | <b>Testing date</b> | 5 February to 19 February 2025 |
| <b>Location</b>                    | Bugesera District                           | <b>Depth (m)</b>    | 2                              |
| <b>Date sample received in Lab</b> | 01 February 2025                            |                     |                                |
| <b>Borehole</b>                    | BH1                                         |                     |                                |

|                                |                         |                  |                                            |
|--------------------------------|-------------------------|------------------|--------------------------------------------|
| Shear box size                 | (60*60*20)mm            |                  |                                            |
| Normal Stress $\delta_n$ (kpa) | Shear strength ts (kPa) | Cohesion C (kPa) | Angle of Internal Friction $\Phi$ (degree) |
| 50.0                           | 46.39                   | 13.92            | 29.68                                      |
| 100.0                          | 64.94                   |                  |                                            |
| 200.0                          | 129.89                  |                  |                                            |

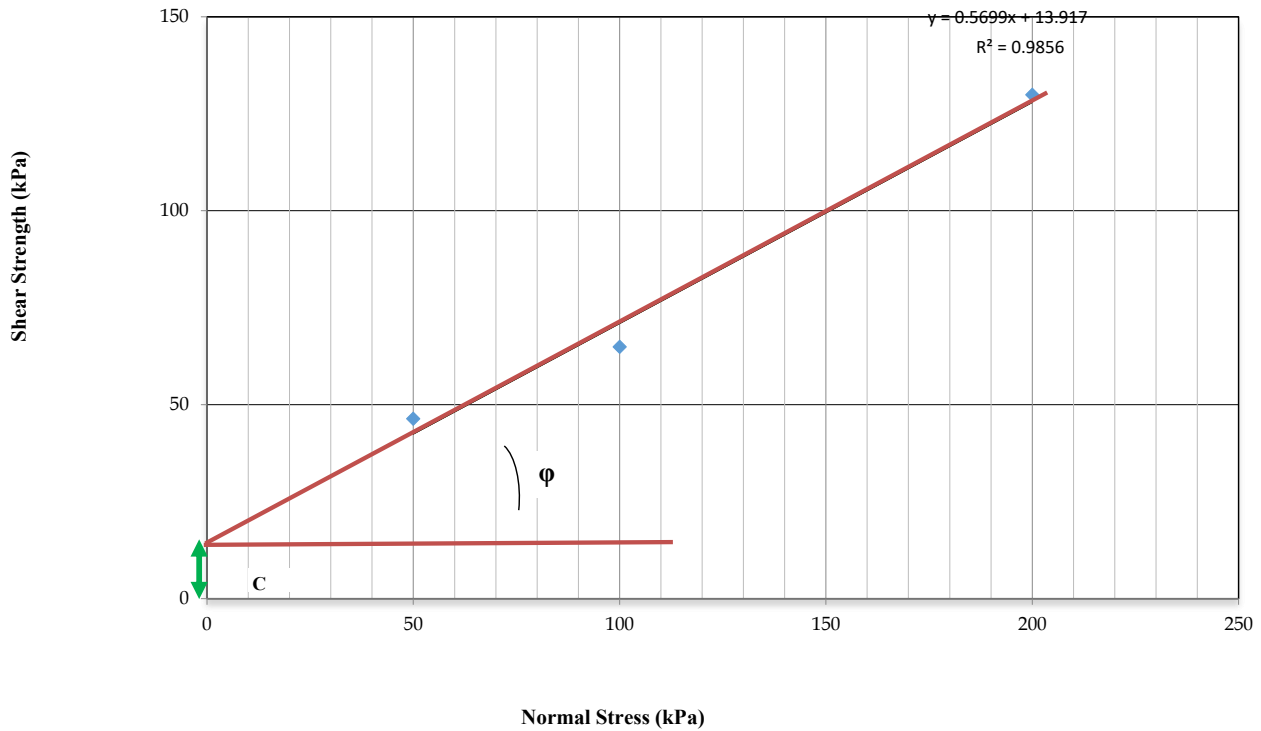

RINCENT BTP

|      |                     |                 |                         |        |
|------|---------------------|-----------------|-------------------------|--------|
| Date | Operator            | Checked by      | Approved by Lab Manager | Remark |
|      | BANGAMWABO Emmanuel | KAMBARI Benitha | IRADUKUNDA Jeremie      |        |

DIRECT SHEAR TEST ACCORDIND TO ASTM D 3080

|                                    |                                             |                     |                                |
|------------------------------------|---------------------------------------------|---------------------|--------------------------------|
| <b>Reseacher</b>                   | IRADULUNDA Jeremie                          | <b>Sample ID</b>    | BTP/015/02/2025                |
| <b>Project</b>                     | BUGESERA - NYANZA - MAMBA TRANSMISSION LINE | <b>Testing date</b> | 5 February to 19 February 2025 |
| <b>Location</b>                    | Bugesera District                           | <b>Depth (m)</b>    | 4                              |
| <b>Date sample received in Lab</b> | 01 February 2025                            |                     |                                |
| <b>Borehole</b>                    | BH1                                         |                     |                                |

|                                |                            |                  |                                            |
|--------------------------------|----------------------------|------------------|--------------------------------------------|
| Shear box size                 | (60*60*20)mm               |                  |                                            |
| Normal Stress $\delta_n$ (kpa) | Shear strength $t_s$ (kPa) | Cohesion C (kPa) | Angle of Internal Friction $\Phi$ (degree) |
| 50.0                           | 46.39                      | 13.92            | 34.06                                      |
| 100.0                          | 83.50                      |                  |                                            |
| 200.0                          | 148.44                     |                  |                                            |

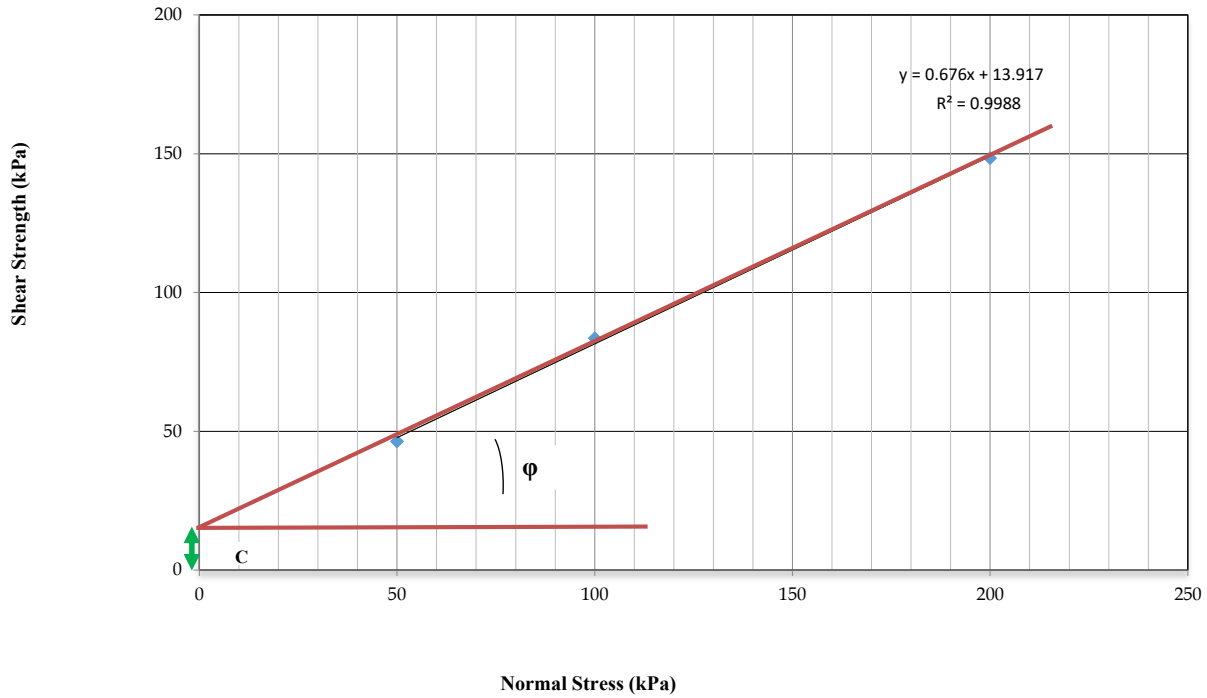

RINCENT BTP

|      |                     |                 |                         |        |
|------|---------------------|-----------------|-------------------------|--------|
| Date | Operator            | Checked by      | Approved by Lab Manager | Remark |
|      | BANGAMWABO Emmanuel | KAMBARI Benitha | IRADUKUNDA Jeremie      |        |

DIRECT SHEAR TEST ACCORDIND TO ASTM D 3080

|                                    |                                             |                     |                                |
|------------------------------------|---------------------------------------------|---------------------|--------------------------------|
| <b>Reseacher</b>                   | IRADULUNDA Jeremie                          | <b>Sample ID</b>    | BTP/016/02/2025                |
| <b>Project</b>                     | BUGESERA - NYANZA - MAMBA TRANSMISSION LINE | <b>Testing date</b> | 5 February to 19 February 2025 |
| <b>Location</b>                    | Bugesera District                           | <b>Depth (m)</b>    | 2                              |
| <b>Date sample received in Lab</b> | 01 February 2025                            |                     |                                |
| <b>Borehole</b>                    | BH2                                         |                     |                                |

|                                |                            |                  |                                            |
|--------------------------------|----------------------------|------------------|--------------------------------------------|
| Shear box size                 | (60*60*20)mm               |                  |                                            |
| Normal Stress $\delta_n$ (kpa) | Shear strength $t_s$ (kPa) | Cohesion C (kPa) | Angle of Internal Friction $\Phi$ (degree) |
| 50.0                           | 41.75                      | 9.28             | 35.09                                      |
| 100.0                          | 83.50                      |                  |                                            |
| 200.0                          | 148.44                     |                  |                                            |

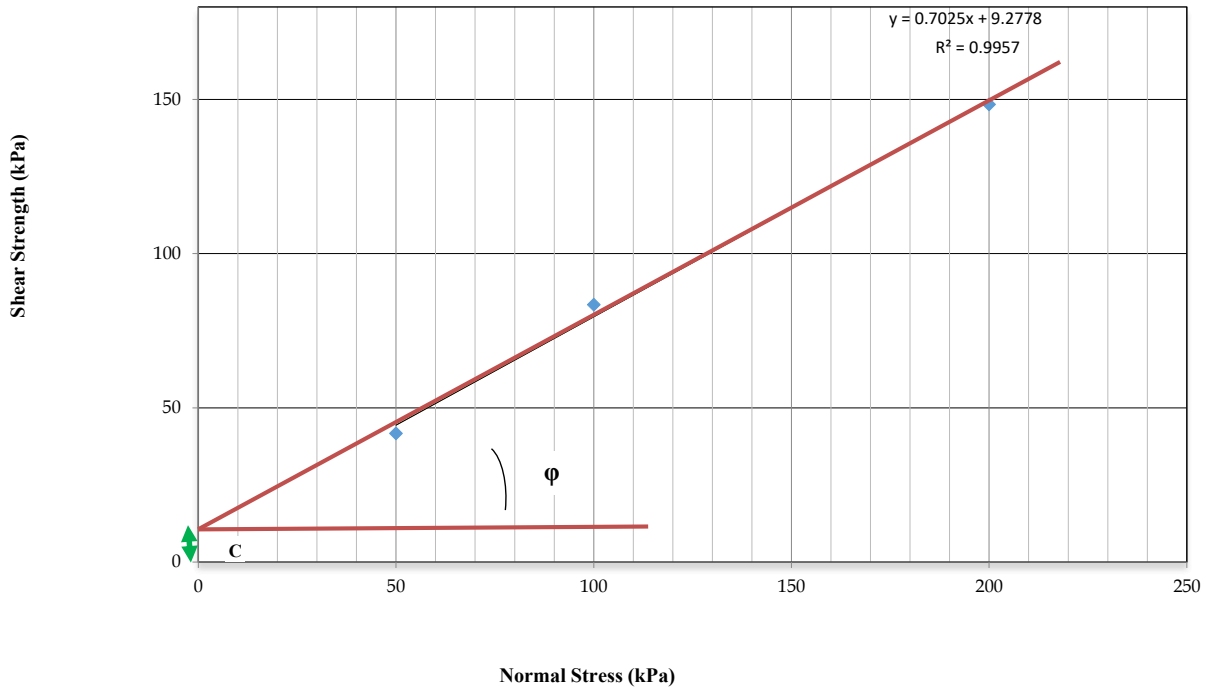

RINCENT BTP

|             |                     |                   |                                |               |
|-------------|---------------------|-------------------|--------------------------------|---------------|
| <b>Date</b> | <b>Operator</b>     | <b>Checked by</b> | <b>Approved by Lab Manager</b> | <b>Remark</b> |
|             | BANGAMWABO Emmanuel | KAMBARI Benitha   | IRADUKUNDA Jeremie             |               |

DIRECT SHEAR TEST ACCORDIND TO ASTM D 3080

|                                    |                                             |                     |                                |
|------------------------------------|---------------------------------------------|---------------------|--------------------------------|
| <b>Reseacher</b>                   | IRADULUNDA Jeremie                          | <b>Sample ID</b>    | BTP/017/02/2025                |
| <b>Project</b>                     | BUGESERA - NYANZA - MAMBA TRANSMISSION LINE | <b>Testing date</b> | 5 February to 19 February 2025 |
| <b>Location</b>                    | Bugesera District                           | <b>Depth (m)</b>    | 4                              |
| <b>Date sample received in Lab</b> | 01 February 2025                            |                     |                                |
| <b>Borehole</b>                    | BH2                                         |                     |                                |

|                                |                            |                  |                                            |
|--------------------------------|----------------------------|------------------|--------------------------------------------|
| Shear box size                 | (60*60*20)mm               |                  |                                            |
| Normal Stress $\delta_n$ (kpa) | Shear strength $t_s$ (kPa) | Cohesion C (kPa) | Angle of Internal Friction $\Phi$ (degree) |
| 50.0                           | 41.75                      | 16.24            | 31.09                                      |
| 100.0                          | 83.50                      |                  |                                            |
| 200.0                          | 134.53                     |                  |                                            |

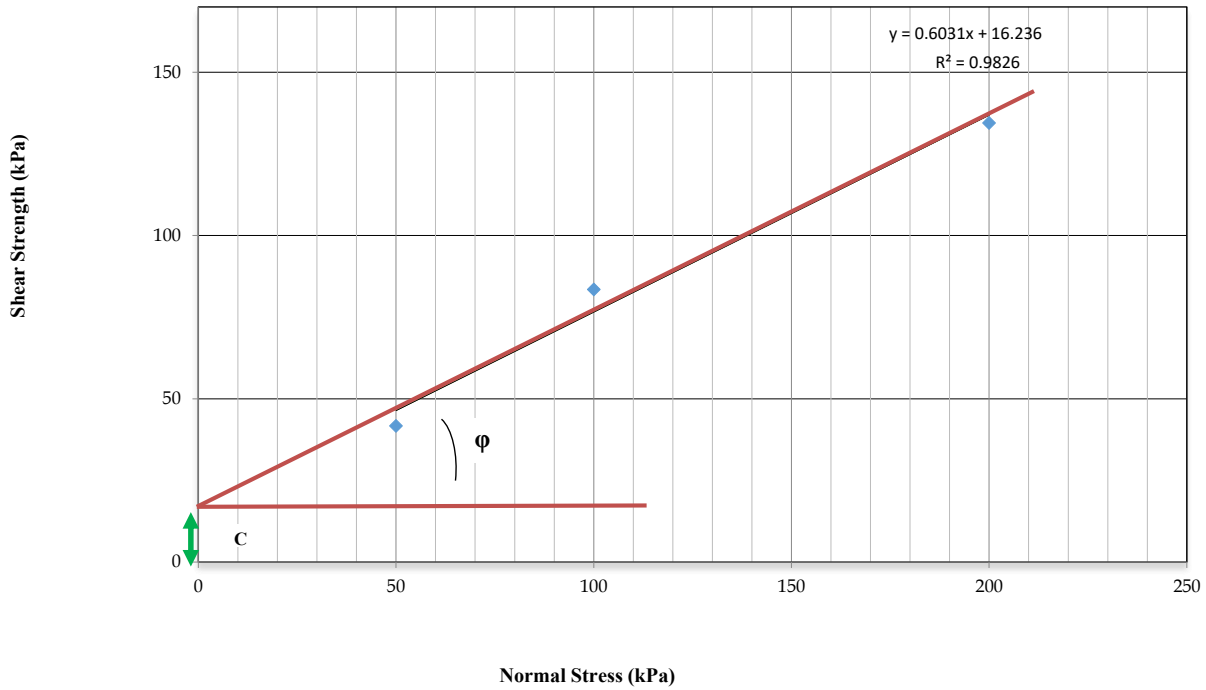

RINCENT BTP

|             |                     |                   |                                |               |
|-------------|---------------------|-------------------|--------------------------------|---------------|
| <b>Date</b> | <b>Operator</b>     | <b>Checked by</b> | <b>Approved by Lab Manager</b> | <b>Remark</b> |
|             | BANGAMWABO Emmanuel | KAMBARI Benitha   | IRADUKUNDA Jeremie             |               |

DIRECT SHEAR TEST ACCORDIND TO ASTM D 3080

|                                    |                                             |                     |                                |
|------------------------------------|---------------------------------------------|---------------------|--------------------------------|
| <b>Reseacher</b>                   | IRADULUNDA Jeremie                          | <b>Sample ID</b>    | BTP/018/02/2025                |
| <b>Project</b>                     | BUGESERA - NYANZA - MAMBA TRANSMISSION LINE | <b>Testing date</b> | 5 February to 19 February 2025 |
| <b>Location</b>                    | Bugesera District                           | <b>Depth (m)</b>    | 2                              |
| <b>Date sample received in Lab</b> | 01 February 2025                            |                     |                                |
| <b>Trial pit</b>                   | BH3                                         |                     |                                |

|                                |                            |                  |                                            |
|--------------------------------|----------------------------|------------------|--------------------------------------------|
| Shear box size                 | (60*60*20)mm               |                  |                                            |
| Normal Stress $\delta_n$ (kpa) | Shear strength $t_s$ (kPa) | Cohesion C (kPa) | Angle of Internal Friction $\Phi$ (degree) |
| 50.0                           | 27.83                      | 9.28             | 16.26                                      |
| 100.0                          | 32.47                      |                  |                                            |
| 200.0                          | 69.58                      |                  |                                            |

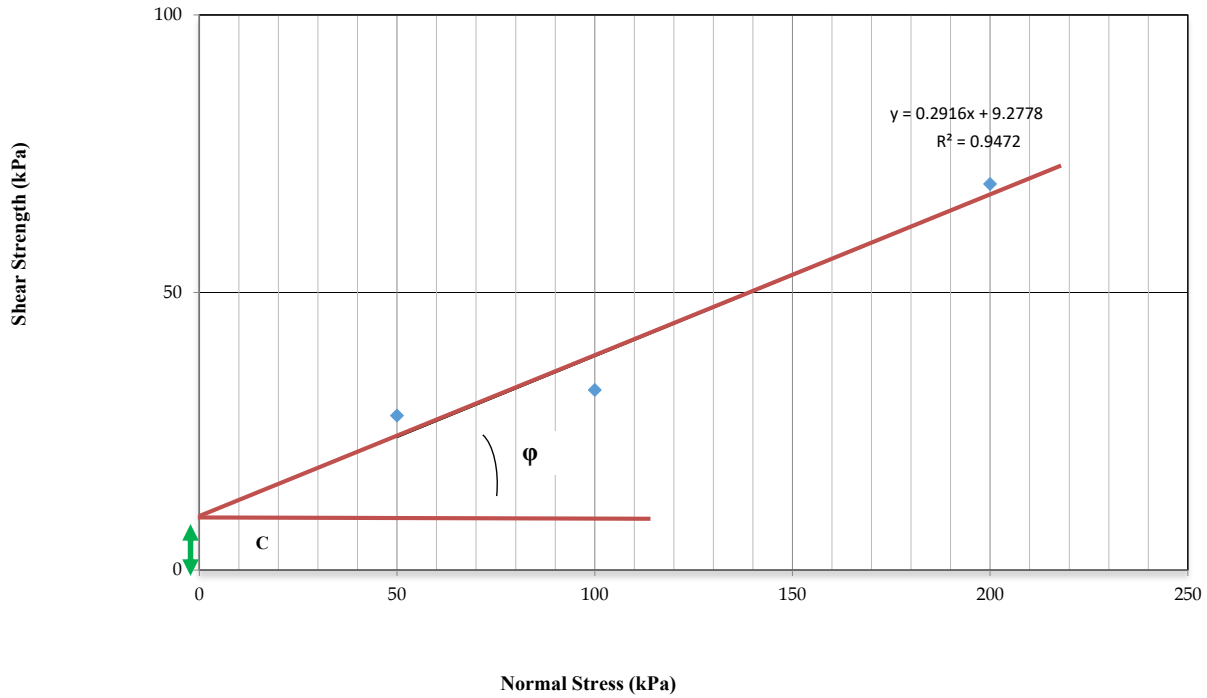

RINCENT BTP

|             |                     |                   |                                |               |
|-------------|---------------------|-------------------|--------------------------------|---------------|
| <b>Date</b> | <b>Operator</b>     | <b>Checked by</b> | <b>Approved by Lab Manager</b> | <b>Remark</b> |
|             | BANGAMWABO Emmanuel | KAMBARI Benitha   | IRADUKUNDA Jeremie             |               |

DIRECT SHEAR TEST ACCORDIND TO ASTM D 3080

|                                    |                                             |                     |                                |
|------------------------------------|---------------------------------------------|---------------------|--------------------------------|
| <b>Reseacher</b>                   | IRADULUNDA Jeremie                          | <b>Sample ID</b>    | BTP/019/02/2025                |
| <b>Project</b>                     | BUGESERA - NYANZA - MAMBA TRANSMISSION LINE | <b>Testing date</b> | 5 February to 19 February 2025 |
| <b>Location</b>                    | Bugesera District                           | <b>Depth (m)</b>    | 4                              |
| <b>Date sample received in Lab</b> | 01 February 2025                            |                     |                                |
| <b>Borehole</b>                    | BH3                                         |                     |                                |

|                                |                            |                  |                                            |
|--------------------------------|----------------------------|------------------|--------------------------------------------|
| Shear box size                 | (60*60*20)mm               |                  |                                            |
| Normal Stress $\delta_n$ (kpa) | Shear strength $t_s$ (kPa) | Cohesion C (kPa) | Angle of Internal Friction $\Phi$ (degree) |
| 50.0                           | 53.35                      | 18.56            | 32.73                                      |
| 100.0                          | 78.86                      |                  |                                            |
| 200.0                          | 148.44                     |                  |                                            |

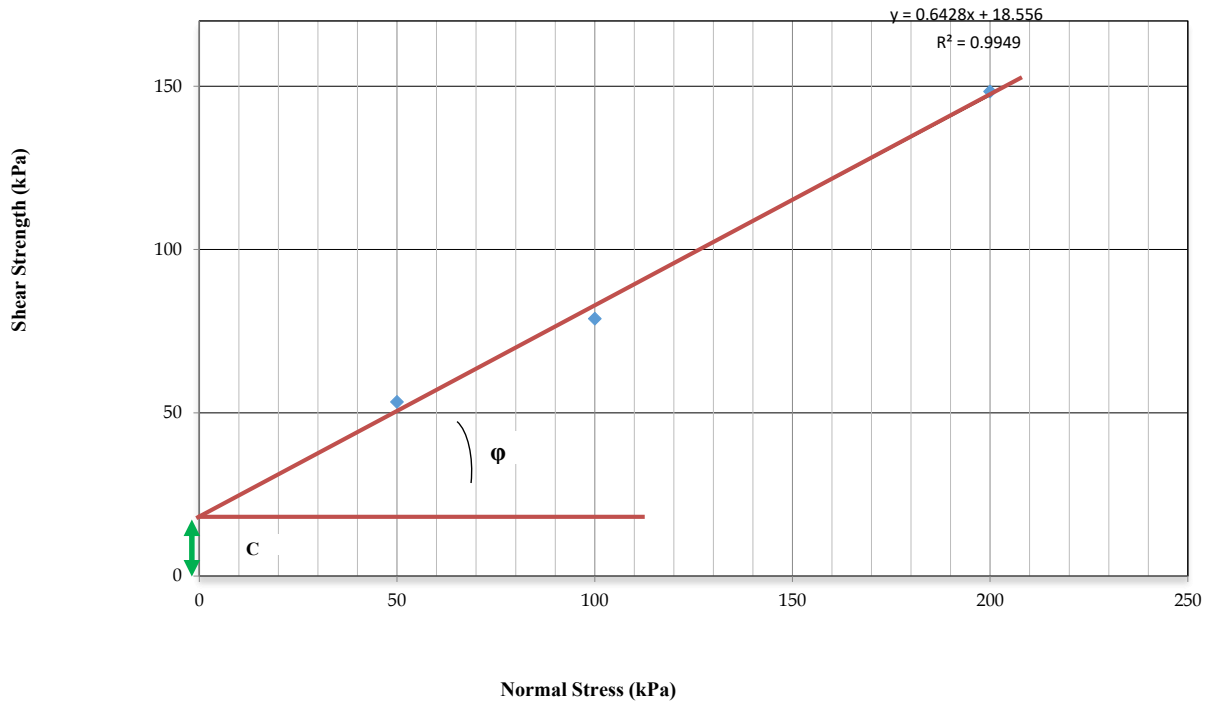

RINCENT BTP

|             |                     |                   |                                |               |
|-------------|---------------------|-------------------|--------------------------------|---------------|
| <b>Date</b> | <b>Operator</b>     | <b>Checked by</b> | <b>Approved by Lab Manager</b> | <b>Remark</b> |
|             | BANGAMWABO Emmanuel | KAMBARI Benitha   | IRADUKUNDA Jeremie             |               |

DIRECT SHEAR TEST ACCORDIND TO ASTM D 3080

|                                    |                                             |                     |                                |
|------------------------------------|---------------------------------------------|---------------------|--------------------------------|
| <b>Reseacher</b>                   | IRADULUNDA Jeremie                          | <b>Sample ID</b>    | BTP/020/02/2025                |
| <b>Project</b>                     | BUGESERA - NYANZA - MAMBA TRANSMISSION LINE | <b>Testing date</b> | 5 February to 19 February 2025 |
| <b>Location</b>                    | Bugesera District                           | <b>Depth (m)</b>    | 2                              |
| <b>Date sample received in Lab</b> | 01 February 2025                            |                     |                                |
| <b>Borehole</b>                    | BH4                                         |                     |                                |

|                                |                            |                  |                                            |
|--------------------------------|----------------------------|------------------|--------------------------------------------|
| Shear box size                 | (60*60*20)mm               |                  |                                            |
| Normal Stress $\delta_n$ (kpa) | Shear strength $t_s$ (kPa) | Cohesion C (kPa) | Angle of Internal Friction $\Phi$ (degree) |
| 50.0                           | 46.39                      | 20.88            | 28.81                                      |
| 100.0                          | 78.86                      |                  |                                            |
| 200.0                          | 129.89                     |                  |                                            |

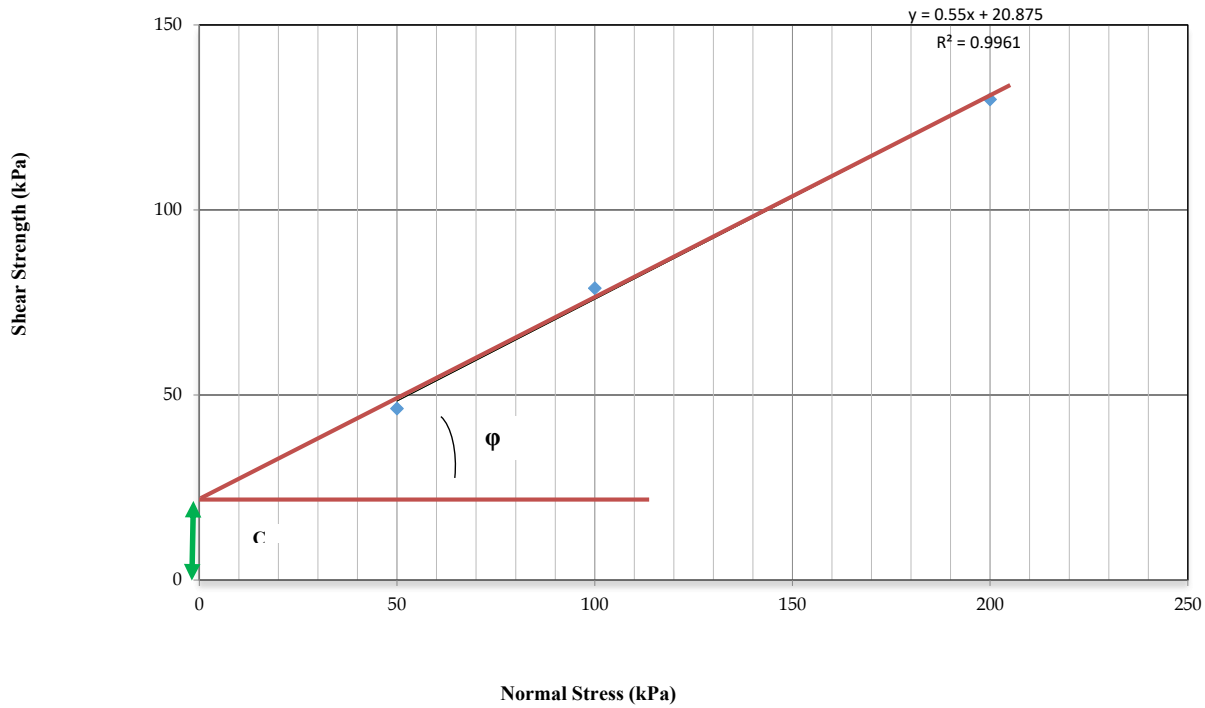

RINCENT BTP

|             |                     |                   |                                |               |
|-------------|---------------------|-------------------|--------------------------------|---------------|
| <b>Date</b> | <b>Operator</b>     | <b>Checked by</b> | <b>Approved by Lab Manager</b> | <b>Remark</b> |
|             | BANGAMWABO Emmanuel | KAMBARI Benitha   | IRADUKUNDA Jeremie             |               |

DIRECT SHEAR TEST ACCORDIND TO ASTM D 3080

|                                    |                                             |                     |                                |
|------------------------------------|---------------------------------------------|---------------------|--------------------------------|
| <b>Reseacher</b>                   | IRADULUNDA Jeremie                          | <b>Sample ID</b>    | BTP/021/02/2025                |
| <b>Project</b>                     | BUGESERA - NYANZA - MAMBA TRANSMISSION LINE | <b>Testing date</b> | 5 February to 19 February 2025 |
| <b>Location</b>                    | Bugesera District                           | <b>Depth (m)</b>    | 4                              |
| <b>Date sample received in Lab</b> | 01 February 2025                            |                     |                                |
| <b>Borehole</b>                    | BH4                                         |                     |                                |

|                                |                            |                  |                                            |
|--------------------------------|----------------------------|------------------|--------------------------------------------|
| Shear box size                 | (60*60*20)mm               |                  |                                            |
| Normal Stress $\delta_n$ (kpa) | Shear strength $t_s$ (kPa) | Cohesion C (kPa) | Angle of Internal Friction $\Phi$ (degree) |
| 50.0                           | 53.35                      | 24.35            | 30.95                                      |
| 100.0                          | 85.82                      |                  |                                            |
| 200.0                          | 143.81                     |                  |                                            |

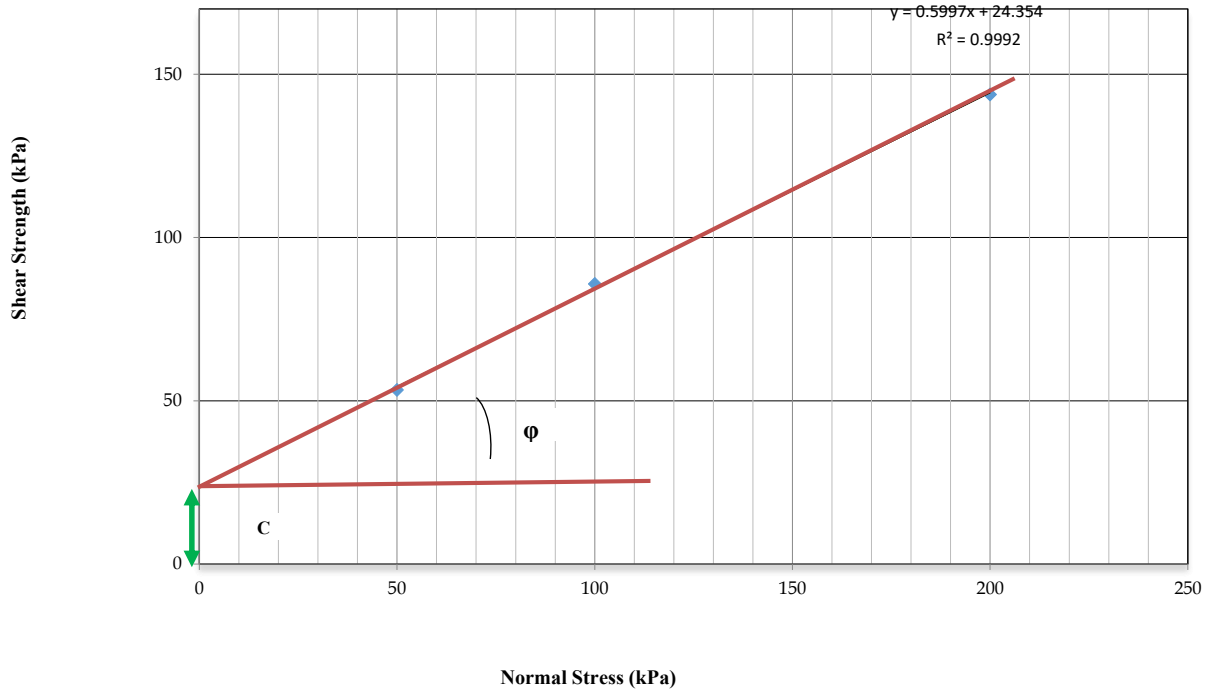

RINCENT BTP

|             |                     |                   |                                |               |
|-------------|---------------------|-------------------|--------------------------------|---------------|
| <b>Date</b> | <b>Operator</b>     | <b>Checked by</b> | <b>Approved by Lab Manager</b> | <b>Remark</b> |
|             | BANGAMWABO Emmanuel | KAMBARI Benitha   | IRADUKUNDA Jeremie             |               |

DIRECT SHEAR TEST ACCORDIND TO ASTM D 3080

|                                    |                                             |                     |                                |
|------------------------------------|---------------------------------------------|---------------------|--------------------------------|
| <b>Reseacher</b>                   | IRADULUNDA Jeremie                          | <b>Sample ID</b>    | BTP/022/02/2025                |
| <b>Project</b>                     | BUGESERA - NYANZA - MAMBA TRANSMISSION LINE | <b>Testing date</b> | 5 February to 19 February 2025 |
| <b>Location</b>                    | Bugesera District                           | <b>Depth (m)</b>    | 2                              |
| <b>Date sample received in Lab</b> | 01 February 2025                            |                     |                                |
| <b>Borehole</b>                    | BH5                                         |                     |                                |

|                                |                         |                  |                                            |
|--------------------------------|-------------------------|------------------|--------------------------------------------|
| Shear box size                 | (60*60*20)mm            |                  |                                            |
| Normal Stress $\delta_n$ (kpa) | Shear strength ts (kPa) | Cohesion C (kPa) | Angle of Internal Friction $\Phi$ (degree) |
| 50.0                           | 48.71                   | 18.56            | 37.31                                      |
| 100.0                          | 106.69                  |                  |                                            |
| 200.0                          | 167.00                  |                  |                                            |

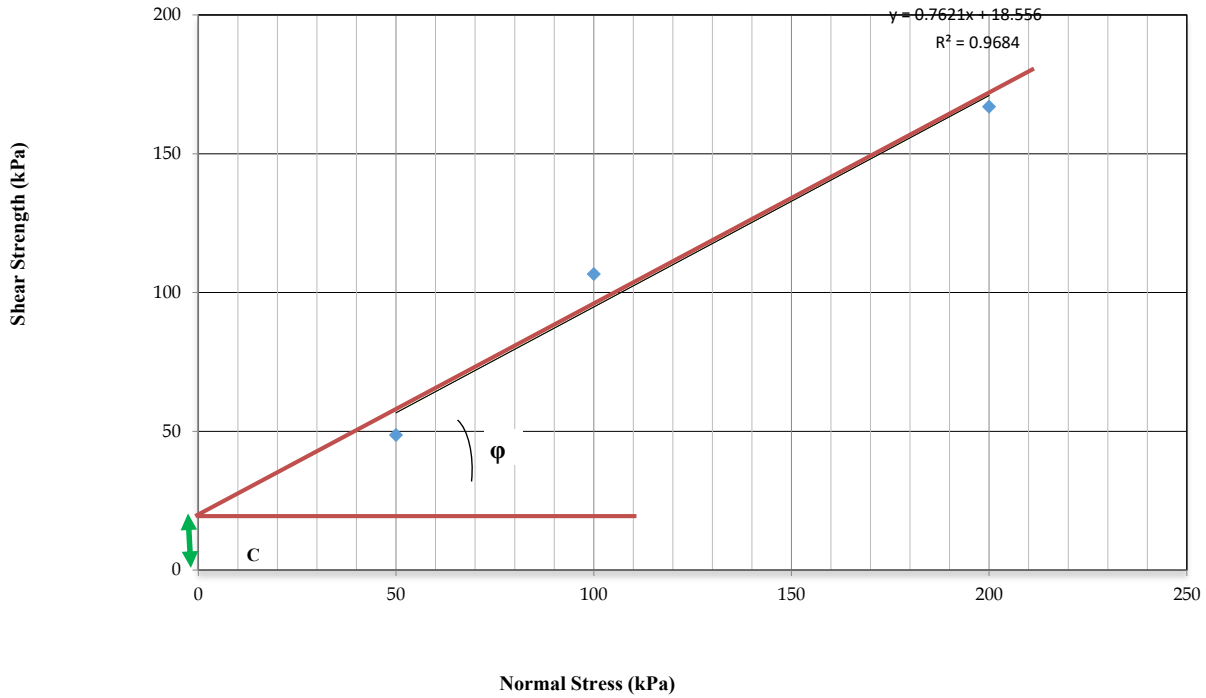

RINCENT BTP

|             |                     |                   |                                |               |
|-------------|---------------------|-------------------|--------------------------------|---------------|
| <b>Date</b> | <b>Operator</b>     | <b>Checked by</b> | <b>Approved by Lab Manager</b> | <b>Remark</b> |
|             | BANGAMWABO Emmanuel | KAMBARI Benitha   | IRADUKUNDA Jeremie             |               |

DIRECT SHEAR TEST ACCORDIND TO ASTM D 3080

|                                    |                                             |                     |                                |
|------------------------------------|---------------------------------------------|---------------------|--------------------------------|
| <b>Reseacher</b>                   | IRADULUNDA Jeremie                          | <b>Sample ID</b>    | BTP/023/02/2025                |
| <b>Project</b>                     | BUGESERA - NYANZA - MAMBA TRANSMISSION LINE | <b>Testing date</b> | 5 February to 19 February 2025 |
| <b>Location</b>                    | Bugesera District                           | <b>Depth (m)</b>    | 4                              |
| <b>Date sample received in Lab</b> | 01 February 2025                            |                     |                                |
| <b>Borehole</b>                    | BH5                                         |                     |                                |

|                                |                            |                  |                                            |
|--------------------------------|----------------------------|------------------|--------------------------------------------|
| Shear box size                 | (60*60*20)mm               |                  |                                            |
| Normal Stress $\delta_n$ (kpa) | Shear strength $t_s$ (kPa) | Cohesion C (kPa) | Angle of Internal Friction $\Phi$ (degree) |
| 50.0                           | 48.71                      | 23.19            | 31.09                                      |
| 100.0                          | 90.46                      |                  |                                            |
| 200.0                          | 141.49                     |                  |                                            |

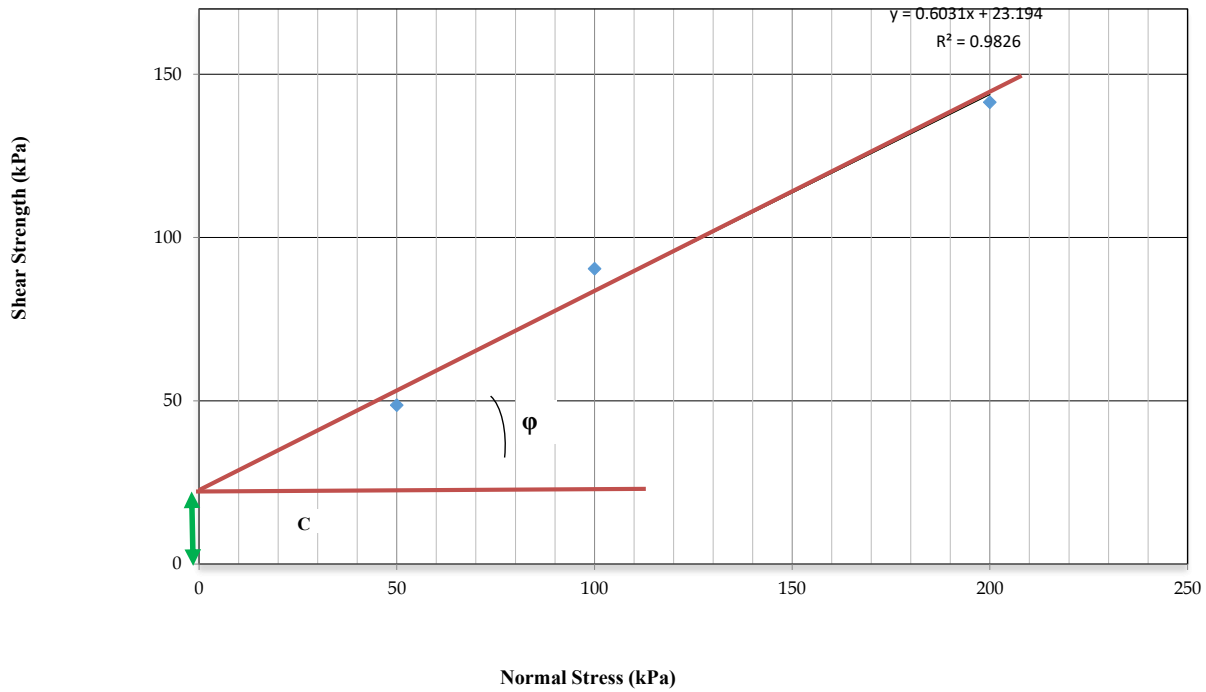

RINCENT BTP

|      |                     |                 |                         |        |
|------|---------------------|-----------------|-------------------------|--------|
| Date | Operator            | Checked by      | Approved by Lab Manager | Remark |
|      | BANGAMWABO Emmanuel | KAMBARI Benitha | IRADUKUNDA Jeremie      |        |

DIRECT SHEAR TEST ACCORDIND TO ASTM D 3080

|                                    |                                             |                     |                                |
|------------------------------------|---------------------------------------------|---------------------|--------------------------------|
| <b>Reseacher</b>                   | IRADULUNDA Jeremie                          | <b>Sample ID</b>    | BTP/024/02/2025                |
| <b>Project</b>                     | BUGESERA - NYANZA - MAMBA TRANSMISSION LINE | <b>Testing date</b> | 5 February to 19 February 2025 |
| <b>Location</b>                    | Bugesera District                           | <b>Depth (m)</b>    | 2                              |
| <b>Date sample received in Lab</b> | 01 February 2025                            |                     |                                |
| <b>Borehole</b>                    |                                             |                     |                                |

|                                |                            |                  |                                            |
|--------------------------------|----------------------------|------------------|--------------------------------------------|
| Shear box size                 | (60*60*20)mm               |                  |                                            |
| Normal Stress $\delta_n$ (kpa) | Shear strength $t_s$ (kPa) | Cohesion C (kPa) | Angle of Internal Friction $\Phi$ (degree) |
| 50.0                           | 51.03                      | 16.24            | 34.32                                      |
| 100.0                          | 83.50                      |                  |                                            |
| 200.0                          | 153.08                     |                  |                                            |

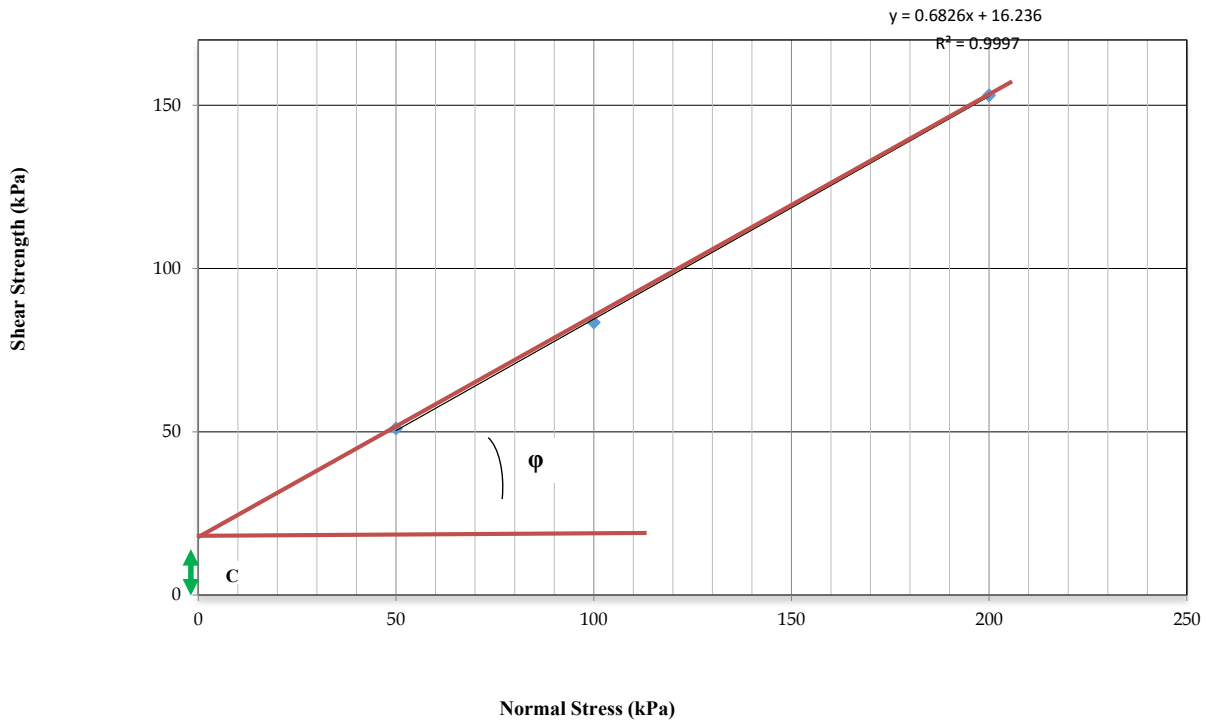

RINCENT BTP

|             |                     |                   |                                |               |
|-------------|---------------------|-------------------|--------------------------------|---------------|
| <b>Date</b> | <b>Operator</b>     | <b>Checked by</b> | <b>Approved by Lab Manager</b> | <b>Remark</b> |
|             | BANGAMWABO Emmanuel | KAMBARI Benitha   | IRADUKUNDA Jeremie             |               |

DIRECT SHEAR TEST ACCORDIND TO ASTM D 3080

|                                    |                                             |                     |                                |
|------------------------------------|---------------------------------------------|---------------------|--------------------------------|
| <b>Reseacher</b>                   | IRADULUNDA Jeremie                          | <b>Sample ID</b>    | BTP/025/02/2025                |
| <b>Project</b>                     | BUGESERA - NYANZA - MAMBA TRANSMISSION LINE | <b>Testing date</b> | 5 February to 19 February 2025 |
| <b>Location</b>                    | Bugesera District                           | <b>Depth (m)</b>    | 4                              |
| <b>Date sample received in Lab</b> | 01 February 2025                            |                     |                                |
| <b>Borehole</b>                    | BH6                                         |                     |                                |

|                                |                         |                  |                                            |
|--------------------------------|-------------------------|------------------|--------------------------------------------|
| Shear box size                 | (60*60*20)mm            |                  |                                            |
| Normal Stress $\delta_n$ (kpa) | Shear strength ts (kPa) | Cohesion C (kPa) | Angle of Internal Friction $\Phi$ (degree) |
| 50.0                           | 51.03                   | 23.19            | 38.49                                      |
| 100.0                          | 120.61                  |                  |                                            |
| 200.0                          | 176.28                  |                  |                                            |

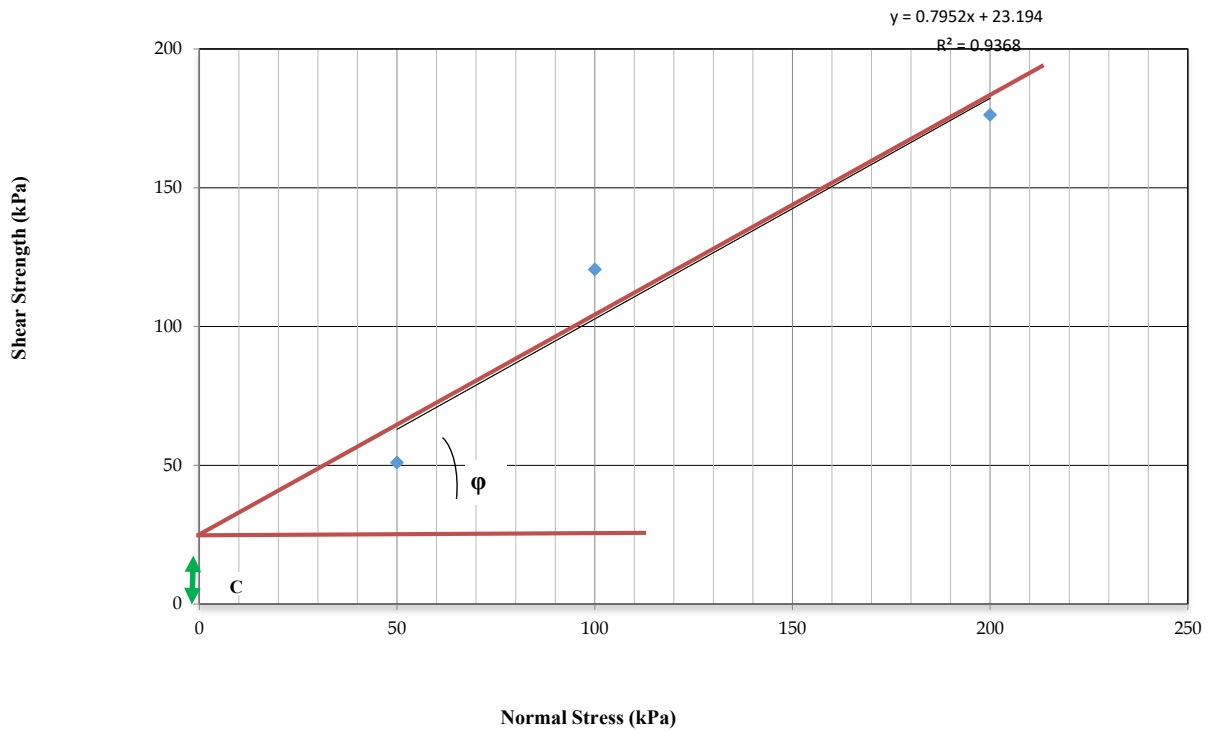

RINCENT BTP

|             |                     |                   |                                |               |
|-------------|---------------------|-------------------|--------------------------------|---------------|
| <b>Date</b> | <b>Operator</b>     | <b>Checked by</b> | <b>Approved by Lab Manager</b> | <b>Remark</b> |
|             | BANGAMWABO Emmanuel | KAMBARI Benitha   | IRADUKUNDA Jeremie             |               |

DIRECT SHEAR TEST ACCORDIND TO ASTM D 3080

|                                    |                                             |                     |                                |
|------------------------------------|---------------------------------------------|---------------------|--------------------------------|
| <b>Reseacher</b>                   | IRADULUNDA Jeremie                          | <b>Sample ID</b>    | BTP/026/02/2025                |
| <b>Project</b>                     | BUGESERA - NYANZA - MAMBA TRANSMISSION LINE | <b>Testing date</b> | 5 February to 19 February 2025 |
| <b>Location</b>                    | Gisagara District                           | <b>Depth (m)</b>    |                                |
| <b>Date sample received in Lab</b> | 01 February 2025                            |                     |                                |
| <b>Trial pit</b>                   |                                             |                     |                                |

|                                |                         |                  |                                            |
|--------------------------------|-------------------------|------------------|--------------------------------------------|
| Shear box size                 | (60*60*20)mm            |                  |                                            |
| Normal Stress $\delta_n$ (kpa) | Shear strength ts (kPa) | Cohesion C (kPa) | Angle of Internal Friction $\Phi$ (degree) |
| 50.0                           | 60.31                   | 27.83            | 31.92                                      |
| 100.0                          | 88.14                   |                  |                                            |
| 200.0                          | 153.08                  |                  |                                            |

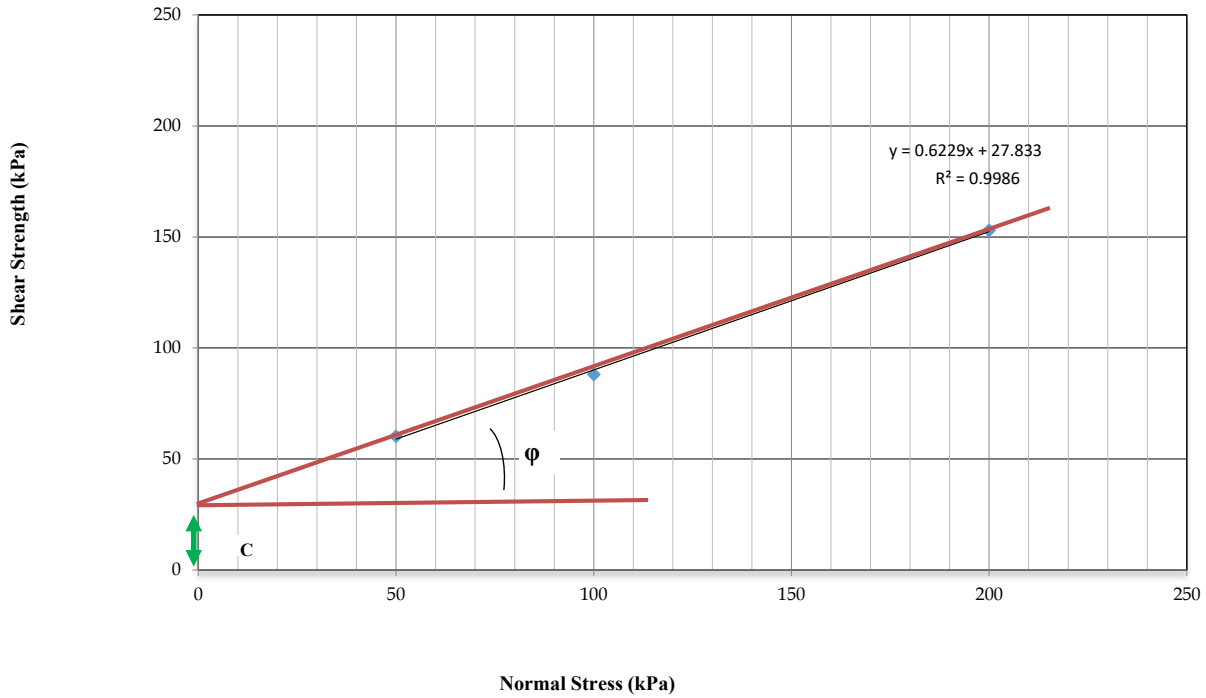

RINCENT BTP

|             |                     |                   |                                |               |
|-------------|---------------------|-------------------|--------------------------------|---------------|
| <b>Date</b> | <b>Operator</b>     | <b>Checked by</b> | <b>Approved by Lab Manager</b> | <b>Remark</b> |
|             | BANGAMWABO Emmanuel | KAMBARI Benitha   | IRADUKUNDA Jeremie             |               |

DIRECT SHEAR TEST ACCORDIND TO ASTM D 3080

|                                    |                                             |                     |                                |
|------------------------------------|---------------------------------------------|---------------------|--------------------------------|
| <b>Reseacher</b>                   | IRADULUNDA Jeremie                          | <b>Sample ID</b>    | BTP/027/02/2025                |
| <b>Project</b>                     | BUGESERA - NYANZA - MAMBA TRANSMISSION LINE | <b>Testing date</b> | 5 February to 19 February 2025 |
| <b>Location</b>                    | Gisagara District                           | <b>Depth (m)</b>    |                                |
| <b>Date sample received in Lab</b> | 01 February 2025                            |                     |                                |
| <b>Borehole</b>                    |                                             |                     |                                |

|                                |                            |                  |                                            |
|--------------------------------|----------------------------|------------------|--------------------------------------------|
| Shear box size                 |                            | (60*60*20)mm     |                                            |
| Normal Stress $\delta_n$ (kpa) | Shear strength $t_s$ (kPa) | Cohesion C (kPa) | Angle of Internal Friction $\Phi$ (degree) |
| 50.0                           | 51.03                      | 13.92            | 35.59                                      |
| 100.0                          | 83.50                      |                  |                                            |
| 200.0                          | 157.72                     |                  |                                            |

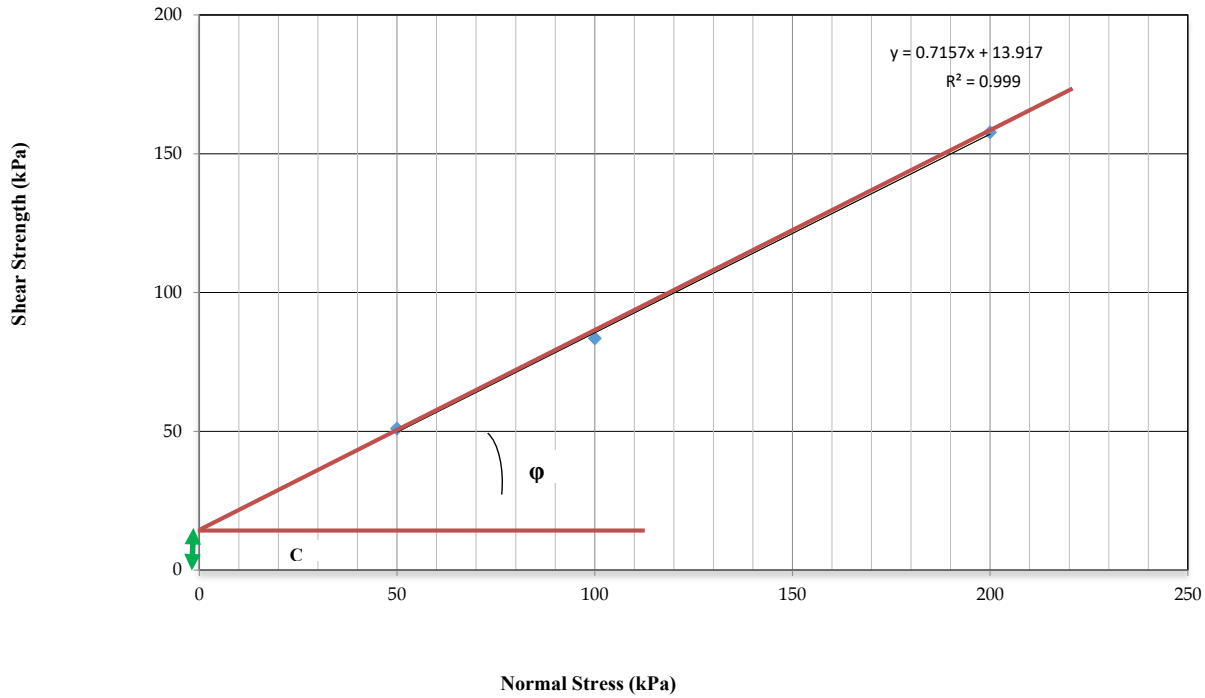

RINCENT BTP

|             |                     |                   |                                |               |
|-------------|---------------------|-------------------|--------------------------------|---------------|
| <b>Date</b> | <b>Operator</b>     | <b>Checked by</b> | <b>Approved by Lab Manager</b> | <b>Remark</b> |
|             | BANGAMWABO Emmanuel | KAMBARI Benitha   | IRADUKUNDA Jeremie             |               |
